# Supplementary material for: Impact of the COVID-19 pandemic on low back pain management in commercially insured and Medicare Advantage cohorts. A retrospective cohort study
Source: bioRxiv or medRxiv preprint supplement (doi:10.1101/2023.05.15.23289993), 2023-05-21
Supplement: Supplementary file [file media-1.pdf]

| <b>Supplement - Episode Duration</b>      |                  |                    |                   |
|-------------------------------------------|------------------|--------------------|-------------------|
|                                           | <b>Pre-COVID</b> | <b>Early COVID</b> | <b>Late COVID</b> |
| <b>Original Cohort</b>                    |                  |                    |                   |
| <b>Episodes - Count</b>                   |                  |                    |                   |
| CI                                        | 150761           | 158123             | 124958            |
| MA                                        | 530583           | 493573             | 368842            |
| <b>Episode Duration - Median (Q1, Q3)</b> |                  |                    |                   |
| CI                                        | 124 (18, 294)    | 93 (12, 248)       | 54 (4, 149)       |
| MA                                        | 248 (79, 460)    | 204 (59, 315)      | 101 (22, 199)     |
| <b>Episodes With Duration &lt;91 days</b> |                  |                    |                   |
| <b>Episodes - Count</b>                   |                  |                    |                   |
| CI                                        | 67158            | 78050              | 76835             |
| MA                                        | 141258           | 152406             | 172461            |
| <b>Episode Duration - Median (Q1, Q3)</b> |                  |                    |                   |
| CI                                        | 12 (1, 43)       | 11 (1, 43)         | 13 (1, 44)        |
| MA                                        | 15 (1, 49)       | 13 (1, 49)         | 16 (1, 50)        |
| <b>Episodes With Duration &lt;61 days</b> |                  |                    |                   |
| <b>Episodes - Count</b>                   |                  |                    |                   |
| CI                                        | 57889            | 66716              | 65586             |
| MA                                        | 117095           | 124549             | 140328            |
| <b>Episode Duration - Median (Q1, Q3)</b> |                  |                    |                   |
| CI                                        | 6 (1, 29)        | 5 (1, 28)          | 6 (1, 29)         |
| MA                                        | 6 (1, 30)        | 2 (1, 29)          | 6 (1, 31)         |

CI=commercial insurance, MA=medicare advantage
