# Supplementary material for: Impact of the COVID-19 pandemic on low back pain management in commercially insured and Medicare Advantage cohorts. A retrospective cohort study
Source: bioRxiv or medRxiv preprint supplement (doi:10.1101/2023.05.15.23289993), 2023-05-21
Supplement: Supplementary file [file media-2.pdf]

**Supplement - State Public Policy Responses to COVID-19**

| Supplement - State Public Policy Responses to COVID-19             |       |       |      |      |          |      |                                            |                                                    |      |       |                                |                          |                                                     |                                                |                                  |                                      |                      |     |     |     |             |            |
|--------------------------------------------------------------------|-------|-------|------|------|----------|------|--------------------------------------------|----------------------------------------------------|------|-------|--------------------------------|--------------------------|-----------------------------------------------------|------------------------------------------------|----------------------------------|--------------------------------------|----------------------|-----|-----|-----|-------------|------------|
| Oxford Stringency on April 1 (low = more restrictive) <sup>1</sup> |       |       |      |      |          |      |                                            | Raifman (low rank = more restrictive) <sup>2</sup> |      |       |                                |                          |                                                     |                                                |                                  |                                      |                      |     |     |     |             |            |
| State                                                              | Score |       | Rank |      | Category |      |                                            | Overall Rank                                       |      | Rank  |                                |                          |                                                     |                                                |                                  |                                      | Days Policy In Place |     |     |     |             |            |
|                                                                    | 2020  | 2021  | 2020 | 2021 | 2020     | 2021 | Combination<br>T25=top 25<br>B25=bottom 25 | Rank Category                                      | Rank | Total | State of<br>Emergency<br>(SOE) | Stay at<br>home<br>(SAH) | Cease<br>elective<br>medical<br>procedures<br>(EMP) | Close non-<br>essential<br>businesses<br>(NEB) | Mask<br>mandate<br>(MM) -<br>SOE | MM -<br>public<br>businesses<br>(PB) | SOE                  | SAH | EMP | NEB | MM -<br>SOE | MM -<br>PB |
| DC                                                                 | 87.04 | 61.11 | 3    | 4    | T25      | T25  | Top 25                                     | Most Restrictive                                   | 10   | 83    | 13                             | 16                       | 33                                                  | 5                                              | 8                                | 8                                    | 731                  | 58  | 0   | 64  | 611         | 575        |
| VT                                                                 | 82.41 | 65.74 | 8    | 2    | T25      | T25  | Top 25                                     | Restrictive                                        | 22   | 140   | 44                             | 23                       | 9                                                   | 38                                             | 15                               | 11                                   | 453                  | 51  | 44  | 32  | 451         | 417        |
| KY                                                                 | 85.19 | 58.33 | 5    | 8    | T25      | T25  | Top 25                                     | Most Restrictive                                   | 6    | 63    | 4                              | 4                        | 6                                                   | 20                                             | 12                               | 17                                   | 736                  | 93  | 48  | 45  | 455         | 390        |
| RI                                                                 | 82.41 | 59.26 | 8    | 7    | T25      | T25  | Top 25                                     | Restrictive                                        | 16   | 119   | 8                              | 30                       | 33                                                  | 30                                             | 9                                | 9                                    | 733                  | 41  | 0   | 39  | 477         | 438        |
| NY                                                                 | 82.41 | 58.33 | 8    | 8    | T25      | T25  | Top 25                                     | Most Restrictive                                   | 2    | 48    | 35                             | 3                        | 1                                                   | 1                                              | 6                                | 2                                    | 468                  | 95  | 78  | 76  | 692         | 652        |
| CA                                                                 | 82.41 | 56.94 | 8    | 13   | T25      | T25  | Top 25                                     | Most Restrictive                                   | 3    | 52    | 2                              | 1                        | 24                                                  | 16                                             | 4                                | 5                                    | 738                  | 306 | 33  | 49  | 701         | 640        |
| CO                                                                 | 82.41 | 56.02 | 8    | 14   | T25      | T25  | Top 25                                     | Restrictive                                        | 27   | 156   | 31                             | 35                       | 23                                                  | 24                                             | 22                               | 21                                   | 477                  | 31  | 34  | 42  | 424         | 382        |
| OH                                                                 | 82.41 | 54.63 | 8    | 18   | T25      | T25  | Top 25                                     | Restrictive                                        | 18   | 130   | 41                             | 18                       | 11                                                  | 28                                             | 16                               | 16                                   | 459                  | 56  | 43  | 40  | 443         | 393        |
| MN                                                                 | 82.41 | 54.63 | 8    | 18   | T25      | T25  | Top 25                                     | Restrictive                                        | 30   | 167   | 35                             | 24                       | 7                                                   | 42                                             | 25                               | 34                                   | 468                  | 50  | 47  | 29  | 421         | 289        |
| AK                                                                 | 85.19 | 53.24 | 5    | 21   | T25      | T25  | Top 25                                     | Least Restrictive                                  | 48   | 246   | 49                             | 42                       | 26                                                  | 41                                             | 44                               | 44                                   | 409                  | 26  | 31  | 30  | 71          | 28         |
| NM                                                                 | 87.04 | 52.31 | 3    | 24   | T25      | T25  | Top 25                                     | Most Restrictive                                   | 4    | 60    | 13                             | 2                        | 24                                                  | 12                                             | 5                                | 4                                    | 731                  | 246 | 33  | 52  | 696         | 641        |
| WA                                                                 | 79.63 | 57.41 | 20   | 12   | T25      | T25  | Top 25                                     | Most Restrictive                                   | 1    | 25    | 1                              | 8                        | 4                                                   | 4                                              | 2                                | 6                                    | 742                  | 68  | 59  | 66  | 732         | 634        |
| ME                                                                 | 81.48 | 55.56 | 17   | 16   | T25      | T25  | Top 25                                     | Restrictive                                        | 28   | 160   | 40                             | 14                       | 33                                                  | 34                                             | 20                               | 19                                   | 465                  | 59  | 0   | 36  | 429         | 383        |
| KS                                                                 | 79.63 | 52.78 | 20   | 23   | T25      | T25  | Top 25                                     | Least Restrictive                                  | 38   | 216   | 44                             | 34                       | 33                                                  | 36                                             | 33                               | 36                                   | 453                  | 34  | 0   | 34  | 379         | 261        |
| OR                                                                 | 78.7  | 61.11 | 26   | 4    | B25      | T25  | Mixed                                      | Most Restrictive                                   | 5    | 62    | 7                              | 5                        | 16                                                  | 12                                             | 10                               | 12                                   | 734                  | 86  | 38  | 52  | 472         | 411        |
| HI                                                                 | 76.85 | 71.3  | 29   | 1    | B25      | T25  | Mixed                                      | Most Restrictive                                   | 8    | 75    | 2                              | 12                       | 33                                                  | 24                                             | 1                                | 3                                    | 738                  | 66  | 0   | 42  | 742         | 645        |
| IL                                                                 | 82.41 | 51.85 | 8    | 26   | T25      | B25  | Mixed                                      | Most Restrictive                                   | 9    | 80    | 8                              | 8                        | 33                                                  | 3                                              | 14                               | 14                                   | 733                  | 68  | 0   | 68  | 452         | 400        |
| MD                                                                 | 87.96 | 50.46 | 1    | 33   | T25      | B25  | Mixed                                      | Restrictive                                        | 16   | 119   | 32                             | 27                       | 11                                                  | 12                                             | 19                               | 18                                   | 476                  | 45  | 43  | 52  | 430         | 387        |
| ID                                                                 | 87.96 | 50    | 1    | 34   | T25      | B25  | Mixed                                      | Least Restrictive                                  | 39   | 212   | 20                             | 33                       | 33                                                  | 34                                             | 46                               | 46                                   | 729                  | 36  | 0   | 36  | 0           | 0          |
| MA                                                                 | 75.93 | 62.04 | 33   | 3    | B25      | T25  | Mixed                                      | Restrictive                                        | 14   | 110   | 42                             | 19                       | 3                                                   | 10                                             | 17                               | 19                                   | 455                  | 54  | 60  | 54  | 439         | 383        |
| NV                                                                 | 76.85 | 58.33 | 29   | 8    | B25      | T25  | Mixed                                      | Restrictive                                        | 15   | 114   | 17                             | 32                       | 33                                                  | 18                                             | 7                                | 7                                    | 730                  | 39  | 0   | 48  | 688         | 631        |
| LA                                                                 | 75.93 | 59.72 | 33   | 6    | B25      | T25  | Mixed                                      | Restrictive                                        | 19   | 133   | 13                             | 21                       | 16                                                  | 31                                             | 28                               | 24                                   | 731                  | 52  | 38  | 38  | 407         | 357        |
| WV                                                                 | 82.41 | 50.93 | 8    | 32   | T25      | B25  | Mixed                                      | Restrictive                                        | 23   | 145   | 29                             | 30                       | 30                                                  | 28                                             | 13                               | 15                                   | 726                  | 41  | 26  | 40  | 454         | 399        |
| WI                                                                 | 76.85 | 56.02 | 29   | 14   | B25      | T25  | Mixed                                      | Restrictive                                        | 29   | 166   | 17                             | 25                       | 33                                                  | 19                                             | 33                               | 39                                   | 730                  | 48  | 0   | 46  | 379         | 240        |
| NC                                                                 | 80.56 | 51.85 | 19   | 26   | T25      | B25  | Mixed                                      | Restrictive                                        | 25   | 149   | 11                             | 21                       | 33                                                  | 31                                             | 22                               | 31                                   | 732                  | 52  | 0   | 38  | 424         | 318        |
| MI                                                                 | 75.46 | 58.33 | 37   | 8    | B25      | T25  | Mixed                                      | Restrictive                                        | 26   | 153   | 51                             | 10                       | 2                                                   | 7                                              | 42                               | 41                                   | 202                  | 67  | 68  | 62  | 202         | 155        |
| CT                                                                 | 78.7  | 53.7  | 26   | 20   | B25      | T25  | Mixed                                      | Most Restrictive                                   | 7    | 73    | 11                             | 17                       | 33                                                  | 8                                              | 3                                | 1                                    | 732                  | 57  | 0   | 57  | 730         | 707        |
| IN                                                                 | 79.63 | 51.85 | 20   | 26   | T25      | B25  | Mixed                                      | Restrictive                                        | 13   | 107   | 4                              | 20                       | 13                                                  | 11                                             | 31                               | 28                                   | 736                  | 53  | 41  | 53  | 390         | 335        |
| DE                                                                 | 81.48 | 49.07 | 17   | 35   | T25      | B25  | Mixed                                      | Restrictive                                        | 20   | 138   | 30                             | 10                       | 33                                                  | 22                                             | 21                               | 22                                   | 479                  | 67  | 0   | 44  | 428         | 380        |
| FL                                                                 | 77.31 | 52.31 | 28   | 24   | B25      | T25  | Mixed                                      | Restrictive                                        | 24   | 146   | 38                             | 27                       | 9                                                   | 20                                             | 27                               | 25                                   | 467                  | 45  | 44  | 45  | 415         | 353        |
| NH                                                                 | 85.19 | 41.67 | 5    | 49   | T25      | B25  | Mixed                                      | Restrictive                                        | 21   | 139   | 20                             | 6                        | 33                                                  | 23                                             | 30                               | 27                                   | 729                  | 78  | 0   | 43  | 393         | 345        |
| TN                                                                 | 75.93 | 53.24 | 33   | 21   | B25      | T25  | Mixed                                      | Least Restrictive                                  | 40   | 215   | 17                             | 40                       | 19                                                  | 47                                             | 46                               | 46                                   | 730                  | 27  | 37  | 26  | 0           | 0          |
| MT                                                                 | 79.63 | 48.61 | 20   | 36   | T25      | B25  | Mixed                                      | Least Restrictive                                  | 42   | 226   | 35                             | 37                       | 33                                                  | 42                                             | 39                               | 40                                   | 468                  | 28  | 0   | 29  | 330         | 207        |
| WY                                                                 | 69.44 | 55.56 | 41   | 16   | B25      | T25  | Mixed                                      | Least Restrictive                                  | 34   | 192   | 20                             | 45                       | 33                                                  | 24                                             | 37                               | 33                                   | 729                  | 0   | 0   | 42  | 363         | 315        |
| OK                                                                 | 79.63 | 46.3  | 20   | 40   | T25      | B25  | Mixed                                      | Least Restrictive                                  | 46   | 239   | 49                             | 29                       | 20                                                  | 49                                             | 46                               | 46                                   | 409                  | 44  | 36  | 23  | 0           | 0          |
| PA                                                                 | 79.63 | 43.52 | 20   | 44   | T25      | B25  | Mixed                                      | Most Restrictive                                   | 12   | 98    | 43                             | 13                       | 20                                                  | 2                                              | 10                               | 10                                   | 454                  | 64  | 36  | 74  | 472         | 429        |
| VA                                                                 | 75.93 | 51.85 | 33   | 26   | B25      | B25  | Bottom 25                                  | Restrictive                                        | 17   | 123   | 34                             | 14                       | 20                                                  | 5                                              | 24                               | 26                                   | 469                  | 59  | 36  | 64  | 423         | 346        |
| NJ                                                                 | 76.85 | 47.22 | 29   | 38   | B25      | B25  | Bottom 25                                  | Most Restrictive                                   | 11   | 94    | 46                             | 6                        | 4                                                   | 8                                              | 17                               | 13                                   | 445                  | 78  | 59  | 57  | 439         | 410        |
| MO                                                                 | 67.59 | 51.39 | 43   | 31   | B25      | B25  | Bottom 25                                  | Least Restrictive                                  | 43   | 222   | 20                             | 37                       | 33                                                  | 40                                             | 46                               | 46                                   | 729                  | 28  | 0   | 31  | 0           | 0          |
| TX                                                                 | 75    | 47.69 | 38   | 37   | B25      | B25  | Bottom 25                                  | Least Restrictive                                  | 32   | 182   | 20                             | 36                       | 8                                                   | 42                                             | 38                               | 38                                   | 729                  | 29  | 46  | 29  | 357         | 247        |
| GA                                                                 | 54.63 | 51.85 | 49   | 26   | B25      | B25  | Bottom 25                                  | Least Restrictive                                  | 37   | 204   | 38                             | 37                       | 33                                                  | 45                                             | 28                               | 23                                   | 467                  | 28  | 0   | 28  | 407         | 367        |
| SC                                                                 | 74.07 | 47.22 | 39   | 38   | B25      | B25  | Bottom 25                                  | Least Restrictive                                  | 44   | 231   | 47                             | 40                       | 33                                                  | 50                                             | 26                               | 35                                   | 444                  | 27  | 0   | 19  | 418         | 278        |
| AL                                                                 | 73.61 | 43.52 | 40   | 44   | B25      | B25  | Bottom 25                                  | Least Restrictive                                  | 33   | 187   | 33                             | 42                       | 13                                                  | 38                                             | 32                               | 29                                   | 473                  | 26  | 41  | 32  | 386         | 328        |
| UT                                                                 | 69.44 | 43.98 | 41   | 43   | B25      | B25  | Bottom 25                                  | Least Restrictive                                  | 37   | 204   | 4                              | 45                       | 29                                                  | 36                                             | 45                               | 45                                   | 736                  | 0   | 27  | 34  | 55          | 21         |
| AR                                                                 | 65.74 | 44.44 | 45   | 42   | B25      | B25  | Bottom 25                                  | Least Restrictive                                  | 45   | 232   | 48                             | 45                       | 31                                                  | 45                                             | 33                               | 30                                   | 439                  | 0   | 24  | 28  | 379         | 319        |
| AZ                                                                 | 62.04 | 45.83 | 47   | 41   | B25      | B25  | Bottom 25                                  | Restrictive                                        | 26   | 153   | 13                             | 26                       | 15                                                  | 31                                             | 36                               | 32                                   | 731                  | 46  | 40  | 38  | 374         | 317        |
| NE                                                                 | 66.2  | 43.52 | 44   | 44   | B25      | B25  | Bottom 25                                  | Least Restrictive                                  | 35   | 195   | 20                             | 45                       | 26                                                  | 12                                             | 46                               | 46                                   | 729                  | 0   | 31  | 52  | 0           | 0          |
| IA                                                                 | 62.04 | 43.52 | 47   | 44   | B25      | B25  | Bottom 25                                  | Least Restrictive                                  | 31   | 180   | 8                              | 45                       | 28                                                  | 16                                             | 40                               | 43                                   | 733                  | 0   | 30  | 49  | 328         | 80         |
| SD                                                                 | 65.74 | 41.67 | 45   | 49   | B25      | B25  | Bottom 25                                  | Least Restrictive                                  | 47   | 240   | 20                             | 45                       | 32                                                  | 51                                             | 46                               | 46                                   | 729                  | 0   | 22  | 0   | 0           | 0          |
| MS                                                                 | 50.93 | 43.52 | 51   | 44   | B25      | B25  | Bottom 25                                  | Least Restrictive                                  | 41   | 221   | 28                             | 44                       | 16                                                  | 48                                             | 43                               | 42                                   | 728                  | 24  | 38  | 24  | 196         | 143        |
| ND                                                                 | 51.85 | 39.81 | 50   | 51   | B25      | B25  | Bottom 25                                  | Least Restrictive                                  | 36   | 203   | 20                             | 45                       | 33                                                  | 27                                             | 41                               | 37                                   | 729                  | 0   | 0   | 41  | 305         | 260        |

1. Thomas Hale, Noam Angrist, Rafael Goldszmidt, Beatriz Kira, Anna Petherick, Toby Phillips, Samuel Webster, Emily Cameron-Blake, Laura Hallas, Saptarshi Majumdar, and Helen Tatlow. (2021). "A global panel database of pandemic policies (Oxford COVID-19 Government Response Tracker)." Nature Human Behaviour. <https://doi.org/10.1038/s41562-021-01079-8> (accessed 3/15/2023)

2. Raifman J, Nocka K, Jones D, Bor J, Lipson S, Jay J, and Chan P. (2020). "COVID-19 US state policy database." Available at: [www.tinyurl.com/statepolicies](http://www.tinyurl.com/statepolicies) (accessed 3/20/2022)
