# Supplementary material for: Impact of the COVID-19 pandemic on low back pain management in commercially insured and Medicare Advantage cohorts. A retrospective cohort study
Source: bioRxiv or medRxiv preprint supplement (doi:10.1101/2023.05.15.23289993), 2023-05-21
Supplement: Supplementary file [file media-3.pdf]

**Supplement State- Episode distribution by individual home address 5-digit zip code State and insurance coverage**

|         | Episode Count |        |        |        |            |       |       |       |                    |        |        |        | % of Total Episodes |       |       |      |            |       |       |       |                    |       |       |       |
|---------|---------------|--------|--------|--------|------------|-------|-------|-------|--------------------|--------|--------|--------|---------------------|-------|-------|------|------------|-------|-------|-------|--------------------|-------|-------|-------|
|         | Total         |        |        |        | Commercial |       |       |       | Medicare Advantage |        |        |        | Total               |       |       |      | Commercial |       |       |       | Medicare Advantage |       |       |       |
|         | Total         | Pre    | Early  | Late   | Total      | Pre   | Early | Late  | Total              | Pre    | Early  | Late   | Total               | Pre   | Early | Late | Total      | Pre   | Early | Late  | Total              | Pre   | Early | Late  |
| Total   | 688168        | 208416 | 230456 | 249296 | 222043     | 67158 | 78050 | 76835 | 466125             | 141258 | 152406 | 172461 | 100%                | 100%  | 100%  | 100% | 100%       | 100%  | 100%  | 100%  | 100%               | 100%  | 100%  | 100%  |
| FL      | 70055         | 22045  | 23535  | 24475  | 19144      | 5793  | 6816  | 6535  | 50911              | 16252  | 16719  | 17940  | 10.2%               | 10.6% | 10.2% | 9.8% | 8.6%       | 8.6%  | 8.7%  | 8.5%  | 10.9%              | 11.5% | 11.0% | 10.4% |
| TX      | 66761         | 20158  | 22504  | 24099  | 24166      | 7206  | 8320  | 8640  | 42595              | 12952  | 14184  | 15459  | 9.7%                | 9.7%  | 9.8%  | 9.7% | 10.9%      | 10.7% | 10.7% | 11.2% | 9.1%               | 9.2%  | 9.3%  | 9.0%  |
| NY      | 44878         | 14494  | 14703  | 15681  | 23634      | 7784  | 7776  | 8074  | 21244              | 6710   | 6927   | 7607   | 6.5%                | 7.0%  | 6.4%  | 6.3% | 10.6%      | 11.6% | 10.0% | 10.5% | 4.6%               | 4.8%  | 4.5%  | 4.4%  |
| CA      | 43115         | 13828  | 14597  | 14690  | 13984      | 4279  | 4857  | 4848  | 29131              | 9549   | 9740   | 9842   | 6.3%                | 6.6%  | 6.3%  | 5.9% | 6.3%       | 6.4%  | 6.2%  | 6.3%  | 6.2%               | 6.8%  | 6.4%  | 5.7%  |
| GA      | 34852         | 11083  | 11612  | 12157  | 5685       | 1590  | 2083  | 2012  | 29167              | 9493   | 9529   | 10145  | 5.1%                | 5.3%  | 5.0%  | 4.9% | 2.6%       | 2.4%  | 2.7%  | 2.6%  | 6.3%               | 6.7%  | 6.3%  | 5.9%  |
| IL      | 34556         | 10564  | 11380  | 12612  | 11484      | 3363  | 4137  | 3984  | 23072              | 7201   | 7243   | 8628   | 5.0%                | 5.1%  | 4.9%  | 5.1% | 5.2%       | 5.0%  | 5.3%  | 5.2%  | 4.9%               | 5.1%  | 4.8%  | 5.0%  |
| NC      | 27782         | 8000   | 9445   | 10337  | 7717       | 2292  | 2793  | 2632  | 20065              | 5708   | 6652   | 7705   | 4.0%                | 3.8%  | 4.1%  | 4.1% | 3.5%       | 3.4%  | 3.6%  | 3.4%  | 4.3%               | 4.0%  | 4.4%  | 4.5%  |
| WI      | 27616         | 8520   | 9300   | 9796   | 6710       | 1997  | 2371  | 2342  | 20906              | 6523   | 6929   | 7454   | 4.0%                | 4.1%  | 4.0%  | 3.9% | 3.0%       | 3.0%  | 3.0%  | 3.0%  | 4.5%               | 4.6%  | 4.5%  | 4.3%  |
| MO      | 25637         | 7606   | 8628   | 9403   | 8949       | 2724  | 3222  | 3003  | 16688              | 4882   | 5406   | 6400   | 3.7%                | 3.6%  | 3.7%  | 3.8% | 4.0%       | 4.1%  | 4.1%  | 3.9%  | 3.6%               | 3.5%  | 3.5%  | 3.7%  |
| AZ      | 23297         | 7614   | 7611   | 8072   | 6007       | 1953  | 2110  | 1944  | 17290              | 5661   | 5501   | 6128   | 3.4%                | 3.7%  | 3.3%  | 3.2% | 2.7%       | 2.9%  | 2.7%  | 2.5%  | 3.7%               | 4.0%  | 3.6%  | 3.6%  |
| OH      | 20342         | 5909   | 6983   | 7450   | 7134       | 2126  | 2597  | 2411  | 13208              | 3783   | 4386   | 5039   | 3.0%                | 2.8%  | 3.0%  | 3.0% | 3.2%       | 3.2%  | 3.3%  | 3.1%  | 2.8%               | 2.7%  | 2.9%  | 2.9%  |
| CT      | 20080         | 6229   | 6407   | 7444   | 4916       | 1510  | 1695  | 1711  | 15164              | 4719   | 4712   | 5733   | 2.9%                | 3.0%  | 2.8%  | 3.0% | 2.2%       | 2.2%  | 2.2%  | 2.2%  | 3.3%               | 3.3%  | 3.1%  | 3.3%  |
| NJ      | 19488         | 6230   | 6197   | 7061   | 9024       | 2961  | 2939  | 3124  | 10464              | 3269   | 3258   | 3937   | 2.8%                | 3.0%  | 2.7%  | 2.8% | 4.1%       | 4.4%  | 3.8%  | 4.1%  | 2.2%               | 2.3%  | 2.1%  | 2.3%  |
| IN      | 19039         | 5394   | 6429   | 7216   | 4198       | 1258  | 1535  | 1405  | 14841              | 4136   | 4894   | 5811   | 2.8%                | 2.6%  | 2.8%  | 2.9% | 1.9%       | 1.9%  | 2.0%  | 1.8%  | 3.2%               | 2.9%  | 3.2%  | 3.4%  |
| CO      | 17613         | 5450   | 6048   | 6115   | 6267       | 1920  | 2209  | 2138  | 11346              | 3530   | 3839   | 3977   | 2.6%                | 2.6%  | 2.6%  | 2.5% | 2.8%       | 2.9%  | 2.8%  | 2.8%  | 2.4%               | 2.5%  | 2.5%  | 2.3%  |
| SC      | 14618         | 4463   | 5014   | 5141   | 1643       | 428   | 613   | 602   | 12975              | 4035   | 4401   | 4539   | 2.1%                | 2.1%  | 2.2%  | 2.1% | 0.7%       | 0.6%  | 0.8%  | 0.8%  | 2.8%               | 2.9%  | 2.9%  | 2.6%  |
| WA      | 13552         | 4277   | 4511   | 4764   | 2407       | 684   | 866   | 857   | 11145              | 3593   | 3645   | 3907   | 2.0%                | 2.1%  | 2.0%  | 1.9% | 1.1%       | 1.0%  | 1.1%  | 1.1%  | 2.4%               | 2.5%  | 2.4%  | 2.3%  |
| AL      | 13091         | 3441   | 4584   | 5066   | 695        | 194   | 253   | 248   | 12396              | 3247   | 4331   | 4818   | 1.9%                | 1.7%  | 2.0%  | 2.0% | 0.3%       | 0.3%  | 0.3%  | 0.3%  | 2.7%               | 2.3%  | 2.8%  | 2.8%  |
| VA      | 13052         | 3717   | 4417   | 4918   | 6616       | 2052  | 2324  | 2240  | 6436               | 1665   | 2093   | 2678   | 1.9%                | 1.8%  | 1.9%  | 2.0% | 3.0%       | 3.1%  | 3.0%  | 2.9%  | 1.4%               | 1.2%  | 1.4%  | 1.6%  |
| TN      | 11984         | 3400   | 4118   | 4466   | 4829       | 1323  | 1708  | 1798  | 7155               | 2077   | 2410   | 2668   | 1.7%                | 1.6%  | 1.8%  | 1.8% | 2.2%       | 2.0%  | 2.2%  | 2.3%  | 1.5%               | 1.5%  | 1.6%  | 1.5%  |
| OR      | 11178         | 3339   | 3805   | 4034   | 1899       | 562   | 724   | 613   | 9279               | 2777   | 3081   | 3421   | 1.6%                | 1.6%  | 1.7%  | 1.6% | 0.9%       | 0.8%  | 0.9%  | 0.8%  | 2.0%               | 2.0%  | 2.0%  | 2.0%  |
| UT      | 10536         | 3210   | 3483   | 3843   | 1607       | 423   | 581   | 603   | 8929               | 2787   | 2902   | 3240   | 1.5%                | 1.5%  | 1.5%  | 1.5% | 0.7%       | 0.6%  | 0.7%  | 0.8%  | 1.9%               | 2.0%  | 1.9%  | 1.9%  |
| PA      | 8877          | 2471   | 2972   | 3434   | 3963       | 1113  | 1386  | 1464  | 4914               | 1358   | 1586   | 1970   | 1.3%                | 1.2%  | 1.3%  | 1.4% | 1.8%       | 1.7%  | 1.8%  | 1.9%  | 1.1%               | 1.0%  | 1.0%  | 1.1%  |
| AR      | 8688          | 2575   | 2900   | 3213   | 2583       | 737   | 903   | 943   | 6105               | 1838   | 1997   | 2270   | 1.3%                | 1.2%  | 1.3%  | 1.3% | 1.2%       | 1.1%  | 1.2%  | 1.2%  | 1.3%               | 1.3%  | 1.3%  | 1.3%  |
| IA      | 8655          | 2471   | 3031   | 3153   | 4088       | 1219  | 1552  | 1317  | 4567               | 1252   | 1479   | 1836   | 1.3%                | 1.2%  | 1.3%  | 1.3% | 1.8%       | 1.8%  | 2.0%  | 1.7%  | 1.0%               | 0.9%  | 1.0%  | 1.1%  |
| OK      | 8457          | 2245   | 2808   | 3404   | 2379       | 715   | 866   | 798   | 6078               | 1530   | 1942   | 2606   | 1.2%                | 1.1%  | 1.2%  | 1.4% | 1.1%       | 1.1%  | 1.1%  | 1.0%  | 1.3%               | 1.1%  | 1.3%  | 1.5%  |
| MD      | 7743          | 2440   | 2590   | 2713   | 6964       | 2241  | 2372  | 2351  | 779                | 199    | 218    | 362    | 1.1%                | 1.2%  | 1.1%  | 1.1% | 3.1%       | 3.3%  | 3.0%  | 3.1%  | 0.2%               | 0.1%  | 0.1%  | 0.2%  |
| MA      | 6072          | 1617   | 1924   | 2531   | 1635       | 404   | 550   | 681   | 4437               | 1213   | 1374   | 1850   | 0.9%                | 0.8%  | 0.8%  | 1.0% | 0.7%       | 0.6%  | 0.7%  | 0.9%  | 1.0%               | 0.9%  | 0.9%  | 1.1%  |
| NE      | 5261          | 1523   | 1776   | 1962   | 1859       | 568   | 698   | 593   | 3402               | 955    | 1078   | 1369   | 0.8%                | 0.7%  | 0.8%  | 0.8% | 0.8%       | 0.8%  | 0.9%  | 0.8%  | 0.7%               | 0.7%  | 0.7%  | 0.8%  |
| LA      | 4805          | 1441   | 1682   | 1682   | 3787       | 1146  | 1352  | 1289  | 1018               | 295    | 330    | 393    | 0.7%                | 0.7%  | 0.7%  | 0.7% | 1.7%       | 1.7%  | 1.7%  | 1.7%  | 0.2%               | 0.2%  | 0.2%  | 0.2%  |
| NM      | 4424          | 1285   | 1496   | 1643   | 672        | 184   | 249   | 239   | 3752               | 1101   | 1247   | 1404   | 0.6%                | 0.6%  | 0.6%  | 0.7% | 0.3%       | 0.3%  | 0.3%  | 0.3%  | 0.8%               | 0.8%  | 0.8%  | 0.8%  |
| ID      | 4240          | 1196   | 1413   | 1631   | 251        | 54    | 84    | 113   | 3989               | 1142   | 1329   | 1518   | 0.6%                | 0.6%  | 0.6%  | 0.7% | 0.1%       | 0.1%  | 0.1%  | 0.1%  | 0.9%               | 0.8%  | 0.9%  | 0.9%  |
| MN      | 3426          | 743    | 1038   | 1645   | 1346       | 378   | 453   | 515   | 2080               | 365    | 585    | 1130   | 0.5%                | 0.4%  | 0.5%  | 0.7% | 0.6%       | 0.6%  | 0.6%  | 0.7%  | 0.4%               | 0.3%  | 0.4%  | 0.7%  |
| KS      | 3299          | 798    | 1064   | 1437   | 1297       | 388   | 496   | 413   | 2002               | 410    | 568    | 1024   | 0.5%                | 0.4%  | 0.5%  | 0.6% | 0.6%       | 0.6%  | 0.6%  | 0.5%  | 0.4%               | 0.3%  | 0.4%  | 0.6%  |
| RI      | 3035          | 969    | 961    | 1105   | 709        | 215   | 235   | 259   | 2326               | 754    | 726    | 846    | 0.4%                | 0.5%  | 0.4%  | 0.4% | 0.3%       | 0.3%  | 0.3%  | 0.3%  | 0.5%               | 0.5%  | 0.5%  | 0.5%  |
| NV      | 2997          | 676    | 1071   | 1250   | 1307       | 372   | 481   | 454   | 1690               | 304    | 590    | 796    | 0.4%                | 0.3%  | 0.5%  | 0.5% | 0.6%       | 0.6%  | 0.6%  | 0.6%  | 0.4%               | 0.2%  | 0.4%  | 0.5%  |
| MI      | 2886          | 869    | 1023   | 994    | 2199       | 645   | 822   | 732   | 687                | 224    | 201    | 262    | 0.4%                | 0.4%  | 0.4%  | 0.4% | 1.0%       | 1.0%  | 1.1%  | 1.0%  | 0.1%               | 0.2%  | 0.1%  | 0.2%  |
| ME      | 2812          | 837    | 917    | 1058   | 267        | 75    | 101   | 91    | 2545               | 762    | 816    | 967    | 0.4%                | 0.4%  | 0.4%  | 0.4% | 0.1%       | 0.1%  | 0.1%  | 0.1%  | 0.5%               | 0.5%  | 0.5%  | 0.6%  |
| KY      | 2752          | 758    | 969    | 1025   | 1645       | 445   | 608   | 592   | 1107               | 313    | 361    | 433    | 0.4%                | 0.4%  | 0.4%  | 0.4% | 0.7%       | 0.7%  | 0.8%  | 0.8%  | 0.2%               | 0.2%  | 0.2%  | 0.3%  |
| NH      | 2655          | 707    | 863    | 1085   | 345        | 76    | 123   | 146   | 2310               | 631    | 740    | 939    | 0.4%                | 0.3%  | 0.4%  | 0.4% | 0.2%       | 0.1%  | 0.2%  | 0.2%  | 0.5%               | 0.4%  | 0.5%  | 0.5%  |
| MS      | 2258          | 598    | 803    | 857    | 1861       | 519   | 709   | 633   | 397                | 79     | 94     | 224    | 0.3%                | 0.3%  | 0.3%  | 0.3% | 0.8%       | 0.8%  | 0.9%  | 0.8%  | 0.1%               | 0.1%  | 0.1%  | 0.1%  |
| WV      | 1475          | 332    | 495    | 648    | 522        | 153   | 188   | 181   | 953                | 179    | 307    | 467    | 0.2%                | 0.2%  | 0.2%  | 0.3% | 0.2%       | 0.2%  | 0.2%  | 0.2%  | 0.2%               | 0.1%  | 0.2%  | 0.3%  |
| VT      | 1401          | 397    | 468    | 536    | 49         | 11    | 16    | 22    | 1352               | 386    | 452    | 514    | 0.2%                | 0.2%  | 0.2%  | 0.2% | 0.0%       | 0.0%  | 0.0%  | 0.0%  | 0.3%               | 0.3%  | 0.3%  | 0.3%  |
| HI      | 1086          | 323    | 359    | 404    | 56         | 16    | 23    | 17    | 1030               | 307    | 336    | 387    | 0.2%                | 0.2%  | 0.2%  | 0.2% | 0.0%       | 0.0%  | 0.0%  | 0.0%  | 0.2%               | 0.2%  | 0.2%  | 0.2%  |
| DC      | 790           | 279    | 243    | 268    | 752        | 265   | 232   | 255   | 38                 | 14     | 11     | 13     | 0.1%                | 0.1%  | 0.1%  | 0.1% | 0.3%       | 0.4%  | 0.3%  | 0.3%  | 0.0%               | 0.0%  | 0.0%  | 0.0%  |
| DE      | 600           | 119    | 181    | 300    | 292        | 71    | 122   | 99    | 308                | 48     | 59     | 201    | 0.1%                | 0.1%  | 0.1%  | 0.1% | 0.1%       | 0.1%  | 0.2%  | 0.1%  | 0.1%               | 0.0%  | 0.0%  | 0.1%  |
| SD      | 451           | 76     | 142    | 233    | 154        | 41    | 51    | 62    | 297                | 35     | 91     | 171    | 0.1%                | 0.0%  | 0.1%  | 0.1% | 0.1%       | 0.1%  | 0.1%  | 0.1%  | 0.1%               | 0.0%  | 0.1%  | 0.1%  |
| VI      | 359           | 71     | 113    | 175    | 224        | 70    | 85    | 69    | 135                | 1      | 28     | 106    | 0.1%                | 0.0%  | 0.0%  | 0.1% | 0.1%       | 0.1%  | 0.1%  | 0.1%  | 0.0%               | 0.0%  | 0.0%  | 0.1%  |
| WY      | 355           | 112    | 127    | 116    | 156        | 52    | 60    | 44    | 199                | 60     | 67     | 72     | 0.1%                | 0.1%  | 0.1%  | 0.0% | 0.1%       | 0.1%  | 0.1%  | 0.1%  | 0.0%               | 0.0%  | 0.0%  | 0.0%  |
| MT      | 302           | 74     | 95     | 133    | 117        | 26    | 43    | 48    | 185                | 48     | 52     | 85     | 0.0%                | 0.0%  | 0.0%  | 0.1% | 0.1%       | 0.0%  | 0.1%  | 0.1%  | 0.0%               | 0.0%  | 0.0%  | 0.0%  |
| ND      | 253           | 44     | 95     | 114    | 137        | 27    | 56    | 54    | 116                | 17     | 39     | 60     | 0.0%                | 0.0%  | 0.0%  | 0.0% | 0.1%       | 0.0%  | 0.1%  | 0.1%  | 0.0%               | 0.0%  | 0.0%  | 0.0%  |
| AK      | 65            | 25     | 24     | 16     | 41         | 18    | 15    | 8     | 24                 | 7      | 9      | 8      | 0.0%                | 0.0%  | 0.0%  | 0.0% | 0.0%       | 0.0%  | 0.0%  | 0.0%  | 0.0%               | 0.0%  | 0.0%  | 0.0%  |
| PR      | 62            | 12     | 27     | 23     | 44         | 6     | 20    | 18    | 18                 | 6      | 7      | 5      | 0.0%                | 0.0%  | 0.0%  | 0.0% | 0.0%       | 0.0%  | 0.0%  | 0.0%  | 0.0%               | 0.0%  | 0.0%  | 0.0%  |
| Unknown | 4505          | 1362   | 1475   | 1668   | 1627       | 486   | 570   | 571   | 2878               | 876    | 905    | 1097   | 0.7%                | 0.7%  | 0.6%  | 0.7% | 0.7%       | 0.7%  | 0.7%  | 0.7%  | 0.6%               | 0.6%  | 0.6%  | 0.6%  |
