# Supplementary material for: Impact of the COVID-19 pandemic on low back pain management in commercially insured and Medicare Advantage cohorts. A retrospective cohort study
Source: bioRxiv or medRxiv preprint supplement (doi:10.1101/2023.05.15.23289993), 2023-05-21
Supplement: Supplementary file [file media-5.pdf]

### Supplement - Table 1 - Cohort and total episode attributes - Full Cohort

| Actuals or Median (Q1, Q3)        | Pre-COVID            | Early COVID          | Late COVID           |
|-----------------------------------|----------------------|----------------------|----------------------|
| Commercial Insurance (CI)         |                      |                      |                      |
| Episodes                          | 150761               | 158123               | 124958               |
| # Unique HCPs                     | 87869                | 92951                | 78634                |
| Total Cost                        | 612354099            | 499764636            | 247289922            |
| Individuals                       | 141338               | 149204               | 124390               |
| Individuals - % Female            | 54.0%                | 53.3%                | 53.2%                |
| Individuals - Age                 | 48 (36, 57)          | 48 (36, 57)          | 48 (35, 57)          |
| Individuals - ERG® Risk Score     | 1.6 (0.7, 3.3)       | 1.6 (0.7, 3.3)       | 1.6 (0.7, 3.2)       |
| Population - % NHW                | 66.7% (48.1%, 79.6%) | 66.8% (47.9%, 79.9%) | 66.4% (46.8%, 79.6%) |
| Population - ADI                  | 40 (21, 60)          | 41 (22, 61)          | 40 (21, 60)          |
| Population - AGI (1000s)          | 74 (55, 110)         | 73 (55, 107)         | 74 (55, 110)         |
| Episode - Total Cost              | \$560 (170, 1937)    | \$447 (134, 1536)    | \$376 (120, 1168)    |
| Episode - # of Different HCP Seen | 2 (1, 3)             | 2 (1, 3)             | 2 (1, 3)             |
| Episode - Duration                | 124 (18, 294)        | 93 (12, 248)         | 54 (4, 149)          |
| Medicare Advantage (MA)           |                      |                      |                      |
| Episodes                          | 530583               | 493573               | 368842               |
| # Unique HCPs                     | 167568               | 167963               | 148372               |
| Total Cost                        | 1552372793           | 992871562            | 438435559            |
| Individuals                       | 491401               | 455171               | 368022               |
| Individuals - % Female            | 62.1%                | 61.4%                | 61.3%                |
| Individuals - Age                 | 72 (66, 77)          | 72 (67, 78)          | 73 (68, 78)          |
| Individuals - ERG® Risk Score     | 1.1 (0.4, 1.9)       | 1.1 (0.5, 2.0)       | 1.2 (0.6, 2.0)       |
| Population - % NHW                | 67.3% (46.1%, 81.3%) | 68.4% (47.0%, 81.8%) | 68.9% (47.5%, 81.9%) |
| Population - ADI                  | 55 (36, 72)          | 55 (36, 72)          | 54 (35, 71)          |
| Population - AGI (1000s)          | 59 (48, 79)          | 60 (49, 79)          | 61 (49, 82)          |
| Episode - Total Cost              | \$579 (141, 1983)    | \$398 (104, 1351)    | \$281 (75, 891)      |
| Episode - # of Different HCP Seen | 2 (1, 4)             | 2 (1, 3)             | 2 (1, 3)             |
| Episode - Duration                | 248 (79, 460)        | 204 (59, 315)        | 101 (22, 199)        |

Within CI and MA, compared to Pre-COVID baseline, cells in red are not significantly different - Mann-Whitney U test (p=0.05)

Comparing MA to CI, all MA measures were significantly different from CI measures - Mann-Whitney U test (p=0.05)
