# Supplementary material for: Impact of the COVID-19 pandemic on low back pain management in commercially insured and Medicare Advantage cohorts. A retrospective cohort study
Source: bioRxiv or medRxiv preprint supplement (doi:10.1101/2023.05.15.23289993), 2023-05-21
Supplement: Supplementary file [file media-6.pdf]

Supplement - Table 1 - Cohort Attributes By Pre-, Early and Late COVID Periods and Stringency of State Public Policy Response

| (Median (IQR) (Q1,Q3))    | Pre-COVID            |                      |                      | Early COVID          |                      |                      | Late COVID           |                      |                      |
|---------------------------|----------------------|----------------------|----------------------|----------------------|----------------------|----------------------|----------------------|----------------------|----------------------|
|                           | Bottom 25            | Mixed                | Top 25 - reference   | Bottom 25            | Mixed                | Top 25 - reference   | Bottom 25            | Mixed                | Top 25 - reference   |
| Commercial Insurance (CI) |                      |                      |                      |                      |                      |                      |                      |                      |                      |
| Episodes                  | 22642                | 25182                | 18772                | 26414                | 30251                | 20710                | 26018                | 29437                | 20722                |
| Individuals               | 21818                | 24446                | 18208                | 25667                | 29480                | 20191                | 25847                | 29228                | 20612                |
| # Unique HCPs             | 15545                | 18509                | 12741                | 17943                | 21735                | 14535                | 17950                | 21376                | 14460                |
| Total Cost                | \$19,574,941         | \$20,622,560         | \$19,582,054         | \$22,168,601         | \$23,868,328         | \$21,222,948         | \$21,334,742         | \$22,658,013         | \$20,491,857         |
| % Female                  | 51.4%                | 51.7%                | 52.3%                | 51.0%                | 50.6%                | 52.2%                | 51.6%                | 51.4%                | 51.9%                |
| Age                       | 43 (32, 54)          | 45 (33, 55)          | 46 (33, 56)          | 44 (32, 54)          | 45 (33, 55)          | 46 (33, 56)          | 44 (32, 55)          | 46 (33, 56)          | 47 (34, 57)          |
| ERG® Risk Score           | 1.1 (0.5, 2.3)       | 1.1 (0.5, 2.3)       | 1.1 (0.6, 2.4)       | 1.1 (0.5, 2.4)       | 1.1 (0.5, 2.5)       | 1.2 (0.6, 2.7)       | 1.2 (0.6, 2.7)       | 1.3 (0.6, 2.7)       | 1.3 (0.6, 2.8)       |
| % NHW                     | 63.2% (45.4%, 78.3%) | 69.6% (51.6%, 81.3%) | 64.7% (45.2%, 77.2%) | 63.8% (45.4%, 78.6%) | 70.0% (51.7%, 81.5%) | 65.0% (45.0%, 77.9%) | 63.1% (44.7%, 77.9%) | 70.4% (51.9%, 81.8%) | 64.6% (44.6%, 77.5%) |
| ADI                       | 43 (26, 62)          | 46 (30, 62)          | 16 (8, 33)           | 45 (27, 64)          | 47 (30, 63)          | 18 (9, 38)           | 44 (26, 63)          | 46 (30, 62)          | 17 (8, 36)           |
| AGI                       | 74 (55, 108)         | 70 (54, 100)         | 89 (62, 151)         | 71 (54, 104)         | 70 (54, 96)          | 85 (60, 142)         | 73 (54, 106)         | 70 (54, 99)          | 87 (61, 143)         |
| Episode Cost              | \$228 (90, 672)      | \$236 (92, 660)      | \$280 (97, 780)      | \$203 (68, 604)      | \$219 (74, 614)      | \$250 (68, 723)      | \$235 (80, 667)      | \$243 (86, 662)      | \$286 (79, 800)      |
| # of HCP Seen             | 1 (1, 2)             | 1 (1, 2)             | 1 (1, 2)             | 1 (1, 2)             | 1 (1, 2)             | 1 (1, 2)             | 1 (1, 2)             | 1 (1, 2)             | 1 (1, 2)             |
| Episode Duration          | 11 (1, 41)           | 12 (1, 42)           | 14 (1, 44)           | 9 (1, 41)            | 11 (1, 43)           | 12 (1, 44)           | 11 (1, 43)           | 13 (1, 44)           | 14 (1, 45)           |
| Medicare Advantage (MA)   |                      |                      |                      |                      |                      |                      |                      |                      |                      |
| Episodes                  | 52167                | 56931                | 31277                | 56383                | 61771                | 33312                | 63274                | 71268                | 36711                |
| Individuals               | 50633                | 55122                | 30331                | 54990                | 60164                | 32468                | 63043                | 70989                | 36562                |
| # Unique HCPs             | 27720                | 30421                | 19599                | 29900                | 33510                | 20726                | 32836                | 37161                | 22535                |
| Total Cost                | \$21,711,015         | \$28,154,001         | \$13,081,009         | \$22,499,132         | \$28,969,993         | \$13,596,880         | \$27,624,391         | \$36,332,634         | \$17,619,987         |
| % Female                  | 61.2%                | 60.6%                | 60.1%                | 61.0%                | 59.7%                | 59.4%                | 61.1%                | 60.2%                | 59.5%                |
| Age                       | 71 (66, 77)          | 72 (68, 78)          | 72 (68, 79)          | 71 (67, 77)          | 73 (68, 78)          | 73 (68, 79)          | 72 (67, 78)          | 73 (68, 79)          | 73 (68, 79)          |
| ERG® Risk Score           | 0.9 (0.4, 1.7)       | 1.0 (0.5, 1.7)       | 0.9 (0.5, 1.6)       | 1.0 (0.4, 1.8)       | 1.0 (0.5, 1.8)       | 1.0 (0.5, 1.8)       | 1.1 (0.5, 1.9)       | 1.1 (0.6, 1.9)       | 1.1 (0.6, 1.8)       |
| % NHW                     | 62.3% (41.3%, 78.4%) | 74.3% (55.7%, 84.7%) | 64.1% (42.2%, 81.1%) | 63.1% (42.1%, 78.6%) | 74.4% (56.2%, 84.9%) | 65.3% (43.0%, 81.6%) | 63.5% (42.8%, 78.9%) | 74.3% (56.5%, 84.7%) | 66.6% (44.2%, 82.1%) |
| ADI                       | 60 (42, 76)          | 53 (38, 68)          | 30 (16, 55)          | 61 (43, 77)          | 54 (38, 69)          | 33 (17, 57)          | 60 (42, 76)          | 54 (38, 69)          | 34 (17, 58)          |
| AGI                       | 57 (46, 75)          | 63 (51, 85)          | 70 (54, 95)          | 56 (46, 74)          | 62 (51, 84)          | 69 (54, 91)          | 57 (46, 75)          | 63 (51, 85)          | 69 (54, 93)          |
| Episode Cost              | \$115 (29, 358)      | \$159 (48, 454)      | \$111 (28, 358)      | \$97 (27, 323)       | \$139 (39, 411)      | \$91 (26, 330)       | \$125 (31, 397)      | \$180 (47, 495)      | \$127 (29, 425)      |
| # of HCP Seen             | 1 (1, 2)             | 1 (1, 2)             | 1 (1, 2)             | 1 (1, 2)             | 1 (1, 2)             | 1 (1, 2)             | 1 (1, 2)             | 1 (1, 2)             | 1 (1, 2)             |
| Episode Duration          | 14 (1, 48)           | 16 (1, 49)           | 16 (1, 49)           | 11 (1, 49)           | 14 (1, 50)           | 13 (1, 50)           | 15 (1, 50)           | 17 (1, 50)           | 17 (1, 51)           |

Pre=Pre-COVID period, Early=first 12 months post-COVID, Late=13-24 months post-COVID

B25=25 least stringent States on 4/1/2020 and 4/1/2021, T25=25 most stringent States on 4/1/2020 and 4/1/2021, Mixed=In Bottom 25 on 4/1/2020 and Top 25 on 4/1/2021, or in Top 25 on 4/1/2020 and Bottom 25 on 4/1/2021

Within Pre-, Early and Late COVID periods compared to Top 25 baseline, cells in red are not significantly different - Mann-Whitney U test (p=0.05)
