# Supplementary material for: Impact of the COVID-19 pandemic on low back pain management in commercially insured and Medicare Advantage cohorts. A retrospective cohort study
Source: bioRxiv or medRxiv preprint supplement (doi:10.1101/2023.05.15.23289993), 2023-05-21
Supplement: Supplementary file [file media-7.pdf]

**Supplement - Table 2 - Type of healthcare provider initially contacted for low back pain - Full Cohort**

|                                 |       | % of Episodes |             |            | RR and 95% CI Compared to Pre |                   |
|---------------------------------|-------|---------------|-------------|------------|-------------------------------|-------------------|
|                                 |       | Pre-COVID     | Early COVID | Late COVID | Early                         | Late              |
| Commercial Insurance (CI)       |       |               |             |            |                               |                   |
| Episodes                        |       | 150761        | 158123      | 124958     |                               |                   |
| Non-Rx                          | DC    | 23.6%         | 24.6%       | 24.1%      | 1.04 (1.03, 1.05)             | 1.02 (1.01, 1.03) |
|                                 | PT    | 3.7%          | 3.1%        | 3.4%       | 0.86 (0.83, 0.89)             | 0.94 (0.90, 0.97) |
|                                 | LAc   | 0.3%          | 0.2%        | 0.2%       | 0.66 (0.57, 0.77)             | 0.72 (0.61, 0.84) |
| Primary Care                    | PCP   | 23.6%         | 24.7%       | 21.7%      | 1.05 (1.03, 1.06)             | 0.92 (0.91, 0.93) |
|                                 | Nurse | 6.7%          | 6.4%        | 5.9%       | 0.96 (0.93, 0.98)             | 0.89 (0.87, 0.92) |
|                                 | PA    | 5.0%          | 4.6%        | 4.7%       | 0.92 (0.89, 0.95)             | 0.95 (0.92, 0.98) |
|                                 | DO    | 0.2%          | 0.2%        | 0.2%       | 0.98 (0.84, 1.15)             | 0.98 (0.83, 1.16) |
| Physician Specialist            | OS    | 7.2%          | 7.4%        | 8.2%       | 1.03 (1.01, 1.06)             | 1.14 (1.11, 1.17) |
|                                 | PM    | 4.4%          | 3.2%        | 2.4%       | 0.72 (0.69, 0.75)             | 0.54 (0.52, 0.56) |
|                                 | PMR   | 3.8%          | 3.2%        | 3.0%       | 0.84 (0.81, 0.87)             | 0.80 (0.77, 0.83) |
|                                 | Neuro | 0.8%          | 0.7%        | 0.6%       | 0.88 (0.81, 0.95)             | 0.70 (0.64, 0.76) |
|                                 | Rheum | 0.8%          | 0.8%        | 0.6%       | 0.94 (0.87, 1.02)             | 0.76 (0.69, 0.83) |
|                                 | NS    | 0.4%          | 0.4%        | 0.4%       | 1.01 (0.91, 1.12)             | 0.94 (0.83, 1.05) |
|                                 | Oth   | 1.9%          | 2.2%        | 1.9%       | 1.13 (1.07, 1.19)             | 1.00 (0.95, 1.05) |
| Emergency Medicine/ Urgent Care | Hosp  | 8.4%          | 8.3%        | 10.2%      | 1.00 (0.97, 1.02)             | 1.22 (1.19, 1.25) |
|                                 | Rad   | 6.8%          | 7.6%        | 9.5%       | 1.11 (1.08, 1.14)             | 1.40 (1.36, 1.43) |
|                                 | EM    | 1.8%          | 1.9%        | 2.2%       | 1.03 (0.98, 1.09)             | 1.17 (1.11, 1.23) |
|                                 | UC    | 0.6%          | 0.6%        | 0.7%       | 1.02 (0.93, 1.12)             | 1.14 (1.04, 1.26) |
| Medicare Advantage (MA)         |       |               |             |            |                               |                   |
| Episodes                        |       | 530583        | 493573      | 368842     |                               |                   |
| Non-Rx                          | DC    | 7.7%          | 7.4%        | 8.4%       | 0.97 (0.95, 0.98)             | 1.09 (1.08, 1.11) |
|                                 | PT    | 2.7%          | 2.3%        | 3.0%       | 0.87 (0.85, 0.89)             | 1.12 (1.09, 1.15) |
|                                 | LAc   | 0.1%          | 0.1%        | 0.1%       | 0.96 (0.83, 1.12)             | 1.69 (1.47, 1.95) |
| Primary Care                    | PCP   | 36.3%         | 39.7%       | 34.2%      | 1.09 (1.09, 1.10)             | 0.94 (0.94, 0.95) |
|                                 | Nurse | 7.8%          | 7.8%        | 6.8%       | 1.00 (0.99, 1.01)             | 0.87 (0.85, 0.88) |
|                                 | PA    | 4.9%          | 4.7%        | 4.5%       | 0.94 (0.92, 0.96)             | 0.92 (0.90, 0.93) |
|                                 | DO    | 0.1%          | 0.1%        | 0.1%       | 0.99 (0.89, 1.11)             | 1.04 (0.92, 1.17) |
| Physician Specialist            | OS    | 4.8%          | 5.0%        | 5.9%       | 1.05 (1.03, 1.07)             | 1.24 (1.22, 1.27) |
|                                 | PM    | 8.6%          | 5.7%        | 3.8%       | 0.66 (0.65, 0.67)             | 0.44 (0.43, 0.45) |
|                                 | PMR   | 3.5%          | 2.7%        | 2.4%       | 0.76 (0.74, 0.77)             | 0.67 (0.65, 0.69) |
|                                 | Neuro | 0.9%          | 0.9%        | 0.6%       | 0.96 (0.92, 1.00)             | 0.71 (0.68, 0.75) |
|                                 | Rheum | 0.9%          | 0.9%        | 0.8%       | 0.98 (0.94, 1.02)             | 0.81 (0.77, 0.84) |
|                                 | NS    | 0.4%          | 0.4%        | 0.3%       | 0.89 (0.84, 0.95)             | 0.80 (0.75, 0.86) |
|                                 | Oth   | 2.1%          | 2.3%        | 2.1%       | 1.13 (1.11, 1.16)             | 1.03 (1.00, 1.06) |
| Emergency Medicine/ Urgent Care | Hosp  | 10.6%         | 10.9%       | 14.6%      | 1.03 (1.02, 1.04)             | 1.38 (1.37, 1.40) |
|                                 | Rad   | 7.3%          | 7.9%        | 10.6%      | 1.08 (1.07, 1.10)             | 1.46 (1.44, 1.48) |
|                                 | EM    | 1.1%          | 1.1%        | 1.4%       | 0.96 (0.92, 0.99)             | 1.27 (1.22, 1.32) |
|                                 | UC    | 0.3%          | 0.3%        | 0.4%       | 1.01 (0.94, 1.09)             | 1.31 (1.21, 1.41) |

Pre=Pre-COVID period, Early=first 12 months post-COVID, Late=13-24 months post-COVID

PCP=primary care physician, PA=physician assistant, DO=doctor of osteopathy, DC=doctor of chiropractic, PT=physical therapist, LAc=licensed acupuncturist, OS=orthopedic surgeon, PMR=physical medicine and rehabilitation, PM=pain management, Neuro=neurologist, Rheum=rheumatologist, NS=neurosurgeon, MD-Oth=other physician specialists, Hosp=hospital, Rad=radiologist, EM=emergency medicine, UC=urgent care

For %, cells with red text indicate the type of HCP initially contacted was not significantly different from pre-COVID period (Fisher's Exact p > .05)

For %, cells with black text indicate the type of HCP initially contacted was significantly different from pre-COVID period (Fisher's Exact p > .05)

For risk ratio, cells in red indicate the confidence interval includes 1 and likelihood of HCP being initially contacted is not different than the pre-COVID reference
