# Supplementary material for: Impact of the COVID-19 pandemic on low back pain management in commercially insured and Medicare Advantage cohorts. A retrospective cohort study
Source: bioRxiv or medRxiv preprint supplement (doi:10.1101/2023.05.15.23289993), 2023-05-21
Supplement: Supplementary file [file media-8.pdf]

Supplement - Table 2 - Type of Health Care Provider Initially Contacted in the Pre-, Early and Late COVID Periods by Stringency of State Public Policy Response

|                           | Type of HCP Initially Contacted |       |       |             |       |       |            |       |       | Risk Ratio and 95% Confidence Interval Compared to Top 25 Baseline |                   |                   |                   |                   |                   | Risk Ratio and 95% Confidence Interval Compared to Pre-COVID Baseline |                   |                   |                   |                   |                   |
|---------------------------|---------------------------------|-------|-------|-------------|-------|-------|------------|-------|-------|--------------------------------------------------------------------|-------------------|-------------------|-------------------|-------------------|-------------------|-----------------------------------------------------------------------|-------------------|-------------------|-------------------|-------------------|-------------------|
|                           | Pre-COVID                       |       |       | Early COVID |       |       | Late COVID |       |       | Pre-COVID                                                          |                   | Early COVID       |                   | Late COVID        |                   | Early COVID                                                           |                   | Late COVID        |                   |                   |                   |
|                           | B25                             | Mixed | T25   | B25         | Mixed | T25   | B25        | Mixed | T25   | Bottom 25                                                          | Mixed             | Bottom 25         | Mixed             | Bottom 25         | Mixed             | Bottom 25                                                             | Mixed             | Top 25            | Bottom 25         | Mixed             | Top 25            |
| Commercial Insurance (CI) |                                 |       |       |             |       |       |            |       |       |                                                                    |                   |                   |                   |                   |                   |                                                                       |                   |                   |                   |                   |                   |
| PCP                       | 20.0%                           | 20.1% | 21.1% | 21.5%       | 21.8% | 22.9% | 19.2%      | 19.7% | 20.3% | 0.95 (0.91, 0.99)                                                  | 0.95 (0.92, 0.99) | 0.94 (0.91, 0.97) | 0.95 (0.92, 0.98) | 0.95 (0.91, 0.98) | 0.97 (0.94, 1.01) | 1.07 (1.04, 1.11)                                                     | 1.08 (1.05, 1.12) | 1.09 (1.05, 1.13) | 0.96 (0.93, 1.00) | 0.98 (0.95, 1.01) | 0.96 (0.92, 1.00) |
| Nurse                     | 6.1%                            | 6.1%  | 4.2%  | 6.3%        | 6.3%  | 4.3%  | 6.2%       | 6.3%  | 4.1%  | 1.43 (1.32, 1.56)                                                  | 1.44 (1.33, 1.57) | 1.48 (1.36, 1.60) | 1.48 (1.37, 1.60) | 1.51 (1.39, 1.63) | 1.51 (1.40, 1.64) | 1.04 (0.97, 1.12)                                                     | 1.04 (0.97, 1.11) | 1.01 (0.92, 1.11) | 1.03 (0.96, 1.10) | 1.02 (0.96, 1.09) | 0.98 (0.89, 1.07) |
| PA                        | 4.0%                            | 5.6%  | 5.7%  | 3.9%        | 5.1%  | 5.3%  | 3.9%       | 5.3%  | 5.2%  | 0.71 (0.65, 0.77)                                                  | 0.98 (0.90, 1.06) | 0.73 (0.67, 0.80) | 0.98 (0.91, 1.05) | 0.75 (0.69, 0.82) | 1.02 (0.95, 1.10) | 0.96 (0.88, 1.05)                                                     | 0.93 (0.86, 0.99) | 0.93 (0.85, 1.01) | 0.98 (0.90, 1.07) | 0.96 (0.90, 1.03) | 0.92 (0.85, 1.00) |
| DO                        | 0.2%                            | 0.2%  | 0.2%  | 0.2%        | 0.2%  | 0.3%  | 0.1%       | 0.2%  | 0.2%  | 0.81 (0.53, 1.24)                                                  | 1.01 (0.68, 1.49) | 0.76 (0.52, 1.10) | 0.73 (0.51, 1.05) | 0.58 (0.38, 0.90) | 1.00 (0.69, 1.44) | 1.12 (0.75, 1.68)                                                     | 0.88 (0.61, 1.25) | 1.20 (0.81, 1.78) | 0.73 (0.46, 1.14) | 1.00 (0.71, 1.42) | 1.01 (0.67, 1.53) |
| DC                        | 30.5%                           | 27.6% | 20.7% | 30.6%       | 27.7% | 20.4% | 29.2%      | 26.3% | 19.2% | 1.48 (1.43, 1.53)                                                  | 1.33 (1.29, 1.38) | 1.50 (1.45, 1.55) | 1.36 (1.32, 1.41) | 1.52 (1.47, 1.57) | 1.37 (1.32, 1.42) | 1.00 (0.97, 1.03)                                                     | 1.01 (0.98, 1.03) | 0.99 (0.95, 1.03) | 0.96 (0.93, 0.98) | 0.95 (0.93, 0.98) | 0.93 (0.89, 0.97) |
| PT                        | 3.0%                            | 2.9%  | 6.2%  | 2.5%        | 2.4%  | 5.0%  | 2.7%       | 2.9%  | 4.7%  | 0.48 (0.44, 0.53)                                                  | 0.62 (0.42, 0.51) | 0.49 (0.45, 0.55) | 0.43 (0.42, 0.44) | 0.59 (0.54, 0.65) | 0.62 (0.57, 0.68) | 0.83 (0.74, 0.92)                                                     | 0.85 (0.77, 0.94) | 0.80 (0.74, 0.87) | 0.92 (0.83, 1.02) | 1.01 (0.92, 1.11) | 0.75 (0.69, 0.81) |
| LAc                       | 0.1%                            | 0.2%  | 0.5%  | 0.0%        | 0.1%  | 0.3%  | 0.0%       | 0.1%  | 0.5%  | 0.11 (0.06, 0.20)                                                  | 0.41 (0.29, 0.57) | 0.15 (0.08, 0.27) | 0.43 (0.29, 0.62) | 0.10 (0.06, 0.18) | 0.28 (0.20, 0.40) | 0.86 (0.40, 1.85)                                                     | 0.68 (0.45, 1.01) | 0.64 (0.47, 0.88) | 0.87 (0.40, 1.88) | 0.66 (0.44, 0.99) | 0.96 (0.73, 1.27) |
| OS                        | 8.1%                            | 8.2%  | 9.5%  | 7.9%        | 8.3%  | 9.6%  | 8.4%       | 8.7%  | 9.6%  | 0.85 (0.80, 0.91)                                                  | 0.87 (0.82, 0.93) | 0.83 (0.78, 0.88) | 0.87 (0.82, 0.92) | 0.87 (0.83, 0.93) | 0.90 (0.86, 0.96) | 0.98 (0.92, 1.04)                                                     | 1.01 (0.95, 1.07) | 1.02 (0.96, 1.08) | 1.04 (0.98, 1.11) | 1.06 (1.00, 1.12) | 1.02 (0.96, 1.08) |
| PMR                       | 2.7%                            | 2.5%  | 4.8%  | 2.4%        | 2.2%  | 4.1%  | 2.5%       | 2.2%  | 4.0%  | 0.58 (0.52, 0.64)                                                  | 0.52 (0.47, 0.57) | 0.58 (0.52, 0.64) | 0.54 (0.49, 0.60) | 0.62 (0.56, 0.68) | 0.50 (0.46, 0.60) | 0.86 (0.77, 0.96)                                                     | 0.90 (0.81, 1.01) | 0.86 (0.79, 0.95) | 0.91 (0.82, 1.02) | 0.89 (0.80, 0.99) | 0.85 (0.78, 0.93) |
| PM                        | 1.7%                            | 1.5%  | 2.0%  | 1.8%        | 1.6%  | 2.0%  | 1.7%       | 1.6%  | 1.8%  | 0.86 (0.75, 0.99)                                                  | 0.76 (0.66, 0.87) | 0.91 (0.80, 1.04) | 0.78 (0.68, 0.89) | 0.95 (0.83, 1.09) | 0.92 (0.81, 1.06) | 1.04 (0.91, 1.19)                                                     | 1.01 (0.88, 1.16) | 0.98 (0.86, 1.13) | 0.96 (0.84, 1.10) | 1.07 (0.94, 1.22) | 0.88 (0.76, 1.01) |
| Neuro                     | 0.4%                            | 0.3%  | 0.9%  | 0.3%        | 0.4%  | 0.8%  | 0.3%       | 0.4%  | 0.7%  | 0.43 (0.33, 0.56)                                                  | 0.40 (0.31, 0.52) | 0.40 (0.31, 0.51) | 0.53 (0.42, 0.66) | 0.40 (0.30, 0.53) | 0.50 (0.39, 0.65) | 0.87 (0.64, 1.17)                                                     | 1.24 (0.95, 1.62) | 0.94 (0.76, 1.16) | 0.75 (0.55, 1.02) | 1.01 (0.76, 1.34) | 0.80 (0.64, 1.00) |
| Rheum                     | 0.4%                            | 0.4%  | 0.6%  | 0.5%        | 0.5%  | 0.6%  | 0.4%       | 0.5%  | 0.6%  | 0.62 (0.51, 0.88)                                                  | 0.66 (0.51, 0.86) | 0.80 (0.62, 1.04) | 0.86 (0.67, 1.09) | 0.76 (0.59, 0.99) | 0.89 (0.69, 1.13) | 1.11 (0.85, 1.45)                                                     | 1.20 (0.93, 1.54) | 0.92 (0.71, 1.19) | 1.05 (0.80, 1.38) | 1.24 (0.96, 1.59) | 0.92 (0.71, 1.19) |
| NS                        | 0.3%                            | 0.4%  | 0.3%  | 0.4%        | 0.3%  | 0.2%  | 0.3%       | 0.4%  | 0.3%  | 0.97 (0.67, 1.40)                                                  | 1.46 (1.05, 2.04) | 1.65 (1.17, 2.33) | 1.50 (1.06, 2.11) | 1.19 (0.85, 1.66) | 1.54 (1.13, 2.11) | 1.40 (1.02, 1.91)                                                     | 0.84 (0.64, 1.10) | 0.82 (0.56, 1.21) | 1.19 (0.86, 1.65) | 1.03 (0.79, 1.33) | 0.97 (0.67, 1.42) |
| MD Oth                    | 1.3%                            | 1.4%  | 1.6%  | 1.6%        | 1.6%  | 2.2%  | 1.4%       | 1.5%  | 1.9%  | 0.60 (0.68, 0.93)                                                  | 0.85 (0.73, 0.99) | 0.72 (0.64, 0.82) | 1.71 (0.63, 0.81) | 0.76 (0.66, 0.87) | 0.80 (0.70, 0.92) | 1.29 (1.11, 1.49)                                                     | 1.18 (1.03, 1.36) | 1.41 (1.22, 1.63) | 1.13 (0.97, 1.31) | 1.11 (0.96, 1.28) | 1.18 (1.02, 1.37) |
| Hosp                      | 9.4%                            | 11.0% | 10.2% | 8.6%        | 9.8%  | 10.3% | 10.3%      | 11.5% | 11.2% | 0.92 (0.86, 0.97)                                                  | 1.07 (1.02, 1.13) | 0.83 (0.79, 0.88) | 0.95 (0.90, 1.00) | 0.92 (0.88, 0.97) | 1.03 (0.98, 1.09) | 0.92 (0.87, 0.97)                                                     | 0.89 (0.85, 0.93) | 1.01 (0.95, 1.07) | 1.10 (1.04, 1.16) | 1.05 (1.00, 1.10) | 1.09 (1.03, 1.15) |
| Rad                       | 8.2%                            | 8.1%  | 8.2%  | 7.9%        | 8.2%  | 8.6%  | 9.3%       | 8.9%  | 12.5% | 1.00 (0.94, 1.07)                                                  | 0.99 (0.93, 1.05) | 0.92 (0.87, 0.98) | 0.95 (0.90, 1.01) | 0.75 (0.71, 0.79) | 0.71 (0.68, 0.75) | 1.07 (0.91, 1.03)                                                     | 1.02 (0.96, 1.07) | 1.05 (0.99, 1.12) | 1.14 (1.07, 1.21) | 1.10 (1.04, 1.16) | 1.52 (1.44, 1.62) |
| EM                        | 2.6%                            | 2.6%  | 2.4%  | 2.7%        | 2.5%  | 2.2%  | 2.9%       | 2.6%  | 2.3%  | 1.06 (0.94, 1.20)                                                  | 1.07 (0.95, 1.20) | 1.24 (1.11, 1.39) | 1.12 (1.00, 1.26) | 1.22 (1.09, 1.37) | 1.10 (0.98, 1.23) | 0.95 (0.94, 1.17)                                                     | 0.94 (0.85, 1.05) | 0.90 (0.79, 1.02) | 1.11 (0.99, 1.23) | 1.10 (0.98, 1.23) | 0.96 (0.85, 1.09) |
| UC                        | 1.1%                            | 0.8%  | 0.9%  | 0.9%        | 0.8%  | 0.9%  | 0.9%       | 0.8%  | 0.9%  | 1.21 (1.00, 1.48)                                                  | 0.97 (0.79, 1.19) | 0.98 (0.81, 1.20) | 0.88 (0.72, 1.07) | 1.01 (0.83, 1.23) | 0.89 (0.73, 1.08) | 0.81 (0.67, 0.97)                                                     | 0.90 (0.75, 1.09) | 0.99 (0.81, 1.23) | 0.83 (0.70, 1.00) | 0.92 (0.76, 1.10) | 1.00 (0.81, 1.23) |
| Medicare Advantage (MA)   |                                 |       |       |             |       |       |            |       |       |                                                                    |                   |                   |                   |                   |                   |                                                                       |                   |                   |                   |                   |                   |
| PCP                       | 34.1%                           | 27.4% | 34.7% | 37.8%       | 30.6% | 38.3% | 32.2%      | 25.6% | 32.5% | 0.98 (0.96, 1.00)                                                  | 0.79 (0.77, 0.81) | 0.99 (0.97, 1.00) | 0.80 (0.78, 0.81) | 0.99 (0.97, 1.01) | 0.79 (0.77, 0.80) | 1.11 (1.09, 1.13)                                                     | 1.11 (1.10, 1.14) | 1.10 (1.08, 1.13) | 0.94 (0.93, 0.96) | 0.93 (0.92, 0.95) | 0.94 (0.92, 0.96) |
| Nurse                     | 6.9%                            | 5.9%  | 5.2%  | 7.4%        | 6.5%  | 5.6%  | 7.2%       | 6.0%  | 4.9%  | 1.34 (1.26, 1.42)                                                  | 1.15 (1.09, 1.22) | 1.33 (1.26, 1.40) | 1.17 (1.11, 1.23) | 1.47 (1.40, 1.55) | 1.24 (1.18, 1.31) | 1.07 (1.03, 1.12)                                                     | 1.10 (1.05, 1.15) | 1.08 (1.01, 1.15) | 1.04 (1.00, 1.08) | 1.02 (0.97, 1.06) | 0.94 (0.88, 1.01) |
| PA                        | 4.2%                            | 4.4%  | 5.1%  | 3.9%        | 4.6%  | 5.0%  | 4.1%       | 4.9%  | 5.1%  | 0.67 (0.56, 0.86)                                                  | 0.85 (0.80, 0.91) | 0.78 (0.73, 0.83) | 0.91 (0.86, 0.97) | 0.81 (0.76, 0.85) | 0.96 (0.91, 1.01) | 0.94 (0.89, 1.00)                                                     | 1.05 (0.99, 1.10) | 0.98 (0.92, 1.05) | 0.99 (0.94, 1.05) | 1.11 (1.06, 1.17) | 1.00 (0.93, 1.06) |
| DO                        | 0.1%                            | 0.1%  | 0.1%  | 0.1%        | 0.1%  | 0.1%  | 0.1%       | 0.1%  | 0.1%  | 1.03 (0.70, 1.53)                                                  | 1.09 (0.74, 1.59) | 0.91 (0.60, 1.38) | 1.15 (0.78, 1.70) | 0.91 (0.65, 1.29) | 0.95 (0.68, 1.33) | 0.76 (0.54, 1.09)                                                     | 0.92 (0.67, 1.26) | 0.87 (0.56, 1.36) | 0.98 (0.71, 1.35) | 0.97 (0.72, 1.31) | 1.11 (0.73, 1.67) |
| DC                        | 8.0%                            | 11.6% | 8.7%  | 7.3%        | 10.4% | 7.7%  | 8.2%       | 10.3% | 8.6%  | 0.92 (0.88, 0.96)                                                  | 1.33 (1.27, 1.39) | 0.95 (0.90, 0.99) | 1.35 (1.29, 1.41) | 0.96 (0.92, 1.01) | 1.20 (1.15, 1.25) | 0.91 (0.87, 0.95)                                                     | 0.90 (0.87, 0.93) | 0.88 (0.84, 0.93) | 1.03 (0.99, 1.07) | 0.89 (0.86, 0.92) | 0.98 (0.93, 1.03) |
| PT                        | 2.8%                            | 3.9%  | 3.9%  | 2.3%        | 3.0%  | 3.0%  | 2.7%       | 3.7%  | 3.7%  | 0.73 (0.68, 0.78)                                                  | 1.00 (0.93, 1.07) | 0.73 (0.68, 0.80) | 1.01 (0.94, 1.09) | 0.71 (0.66, 0.76) | 0.98 (0.92, 1.04) | 0.78 (0.72, 0.84)                                                     | 0.78 (0.73, 0.83) | 0.77 (0.71, 0.83) | 0.93 (0.87, 1.00) | 0.93 (0.88, 0.99) | 0.95 (0.88, 1.03) |
| LAc                       | 0.0%                            | 0.0%  | 0.3%  | 0.0%        | 0.0%  | 0.2%  | 0.0%       | 0.1%  | 0.3%  | 0.07 (0.04, 0.14)                                                  | 0.14 (0.09, 0.22) | 0.12 (0.07, 0.22) | 0.21 (0.13, 0.34) | 0.09 (0.05, 0.14) | 0.21 (0.15, 0.29) | 1.20 (0.53, 2.74)                                                     | 1.10 (0.61, 1.96) | 0.71 (0.51, 0.99) | 1.48 (0.69, 3.21) | 1.83 (1.09, 3.05) | 1.23 (0.93, 1.63) |
| OS                        | 6.8%                            | 7.1%  | 4.7%  | 6.8%        | 6.9%  | 4.6%  | 7.3%       | 7.3%  | 4.9%  | 1.45 (1.37, 1.54)                                                  | 1.51 (1.42, 1.60) | 1.46 (1.38, 1.55) | 1.49 (1.40, 1.57) | 1.48 (1.40, 1.56) | 1.48 (1.40, 1.56) | 1.00 (0.96, 1.04)                                                     | 0.98 (0.94, 1.02) | 0.99 (0.92, 1.06) | 1.07 (1.02, 1.11) | 1.03 (0.99, 1.07) | 1.05 (0.98, 1.12) |
| PMR                       | 2.4%                            | 2.1%  | 2.5%  | 2.0%        | 2.0%  | 2.1%  | 2.1%       | 2.0%  | 2.1%  | 0.96 (0.87, 1.04)                                                  | 0.84 (0.77, 0.91) | 0.95 (0.86, 1.04) | 0.95 (0.87, 1.05) | 0.99 (0.91, 1.09) | 0.98 (0.90, 1.07) | 0.82 (0.76, 0.89)                                                     | 0.94 (0.87, 1.02) | 0.83 (0.75, 0.91) | 0.86 (0.80, 0.93) | 0.97 (0.90, 1.04) | 0.83 (0.75, 0.91) |
| PM                        | 3.3%                            | 3.0%  | 2.1%  | 3.1%        | 2.6%  | 2.0%  | 3.1%       | 2.6%  | 1.8%  | 1.54 (1.41, 1.69)                                                  | 1.42 (1.30, 1.55) | 1.56 (1.43, 1.71) | 1.32 (1.21, 1.44) | 1.76 (1.61, 1.92) | 1.45 (1.33, 1.59) | 0.95 (0.89, 1.02)                                                     | 0.87 (0.82, 0.93) | 0.94 (0.85, 1.05) | 0.94 (0.89, 1.01) | 0.85 (0.80, 0.91) | 0.83 (0.75, 0.92) |
| Neuro                     | 0.5%                            | 0.5%  | 0.6%  | 0.6%        | 0.6%  | 0.6%  | 0.5%       | 0.5%  | 0.5%  | 0.75 (0.63, 0.91)                                                  | 0.79 (0.66, 0.95) | 0.93 (0.78, 1.11) | 1.01 (0.85, 1.20) | 0.89 (0.75, 1.02) | 0.92 (0.77, 1.10) | 1.14 (0.96, 1.34)                                                     | 1.18 (1.01, 1.38) | 0.92 (0.76, 1.12) | 0.98 (0.83, 1.16) | 0.97 (0.83, 1.13) | 0.83 (0.68, 1.01) |
| Rheum                     | 0.7%                            | 0.9%  | 0.8%  | 0.7%        | 0.8%  | 0.6%  | 0.6%       | 0.7%  | 0.6%  | 0.91 (0.78, 1.07)                                                  | 1.14 (0.98, 1.33) | 1.13 (0.96, 1.34) | 1.32 (1.13, 1.55) | 1.05 (0.88, 1.24) | 1.28 (1.09, 1.51) | 1.01 (0.87, 1.16)                                                     | 0.94 (0.83, 1.06) | 0.81 (0.67, 0.98) | 0.84 (0.72, 0.96) | 0.82 (0.73, 0.93) | 0.73 (0.61, 0.88) |
| NS                        | 0.4%                            | 0.3%  | 0.1%  | 0.3%        | 0.3%  | 0.2%  | 0.3%       | 0.2%  | 0.2%  | 2.97 (2.10, 4.18)                                                  | 2.63 (1.87, 3.72) | 2.03 (1.49, 2.75) | 1.77 (1.30, 2.41) | 1.98 (1.48, 2.65) | 1.71 (1.28, 2.30) | 0.87 (0.71, 1.07)                                                     | 0.86 (0.70, 1.05) | 1.28 (0.84, 1.93) | 0.85 (0.69, 1.03) | 0.82 (0.67, 1.01) | 1.27 (0.84, 1.90) |
| MD Oth                    | 2.0%                            | 1.6%  | 1.9%  | 2.3%        | 2.1%  | 2.4%  | 2.1%       | 1.7%  | 2.1%  | 1.07 (0.92, 1.18)                                                  | 0.88 (0.79, 0.98) | 0.97 (0.89, 1.05) | 0.86 (0.79, 0.94) | 0.99 (0.90, 1.08) | 0.82 (0.75, 0.89) | 1.17 (1.08, 1.27)                                                     | 1.27 (1.17, 1.38) | 1.30 (1.17, 1.45) | 1.04 (0.96, 1.13) | 1.06 (0.97, 1.15) | 1.14 (1.02, 1.26) |
| Hosp                      | 15.1%                           | 16.4% | 14.4% | 13.6%       | 15.1% | 13.8% | 16.1%      | 18.0% | 16.7% | 1.05 (1.01, 0.99)                                                  | 1.14 (1.10, 1.18) | 0.98 (0.95, 1.02) | 1.09 (1.05, 1.12) | 0.96 (0.94, 0.99) | 1.08 (1.05, 1.11) | 0.90 (0.88, 0.93)                                                     | 0.92 (0.90, 0.94) | 0.96 (0.93, 1.00) | 1.07 (1.04, 1.10) | 1.10 (1.07, 1.13) | 1.16 (1.12, 1.20) |
| Rad                       | 10.2%                           | 12.6% | 12.1% | 9.6%        | 12.5% | 11.6% | 11.1%      | 14.3% | 13.4% | 0.84 (0.81, 0.88)                                                  | 1.04 (1.00, 1.08) | 0.85 (0.79, 0.86) | 1.07 (1.03, 1.11) | 0.82 (0.80, 0.85) | 1.06 (1.03, 1.10) | 0.94 (0.90, 0.97)                                                     | 0.99 (0.96, 1.02) | 0.96 (0.92, 1.00) | 1.08 (1.05, 1.12) | 1.13 (1.10, 1.17) | 1.11 (1.07, 1.15) |
| EM                        | 2.2%                            | 1.7%  | 1.9%  | 1.9%        | 1.6%  | 1.4%  | 2.0%       | 1.7%  | 1.8%  | 1.14 (1.03, 1.26)                                                  | 0.89 (0.81, 0.99) | 1.35 (1.21, 1.50) | 1.12 (1.00, 1.24) | 1.14 (1.04, 1.25) | 0.95 (0.86, 1.04) | 0.88 (0.81, 0.96)                                                     | 0.93 (0.85, 1.01) | 0.74 (0.66, 0.84) | 0.94 (0.87, 1.02) | 1.00 (0.92, 1.08) | 0.94 (0.84, 1.05) |
| UC                        | 0.4%                            | 0.4%  | 0.8%  | 0.4%        | 0.3%  | 0.7%  | 0.4%       | 0.3%  | 0.7%  | 0.42 (0.35, 0.51)                                                  | 0.46 (0.38, 0.54) | 0.53 (0.44, 0.64) | 0.45 (0.37, 0.55) | 0.53 (0.45, 0.64) | 0.48 (0.40, 0.57) | 1.03 (0.84, 1.25)                                                     | 0.80 (0.66, 0.98) | 0.81 (0.68, 0.96) | 1.07 (0.          |                   |                   |
