# Supplementary material for: Impact of the COVID-19 pandemic on low back pain management in commercially insured and Medicare Advantage cohorts. A retrospective cohort study
Source: bioRxiv or medRxiv preprint supplement (doi:10.1101/2023.05.15.23289993), 2023-05-21
Supplement: Supplementary file [file media-9.pdf]

**Supplement - Table 3 - Type of healthcare services provided for low back pain - Full Cohort**

|                               |                             | % of Episodes |             |            | RR and 95% CI Compared to Pre |                   |
|-------------------------------|-----------------------------|---------------|-------------|------------|-------------------------------|-------------------|
|                               |                             | Pre-COVID     | Early COVID | Late COVID | Early                         | Late              |
| Commercial Insurance (CI)     |                             |               |             |            |                               |                   |
| Episodes - At Least 1 Service |                             | 150705        | 158069      | 124913     |                               |                   |
| First Line                    | Manipulation - Chiropractic | 27.6%         | 28.2%       | 26.9%      | 1.02 (1.01, 1.03)             | 0.98 (0.96, 0.99) |
|                               | Active Care                 | 26.5%         | 25.5%       | 25.9%      | 0.96 (0.95, 0.97)             | 0.98 (0.97, 0.99) |
|                               | Manual Therapy              | 17.8%         | 16.4%       | 16.3%      | 0.92 (0.91, 0.94)             | 0.92 (0.90, 0.93) |
|                               | Passive Therapy             | 15.8%         | 14.8%       | 13.5%      | 0.94 (0.92, 0.95)             | 0.86 (0.84, 0.87) |
|                               | Acupuncture                 | 0.8%          | 0.6%        | 0.6%       | 0.70 (0.65, 0.77)             | 0.71 (0.65, 0.77) |
|                               | Manipulation - Osteopathic  | 0.8%          | 0.7%        | 0.7%       | 0.94 (0.87, 1.02)             | 0.84 (0.77, 0.92) |
| Second Line                   | Imaging - Radiography       | 36.8%         | 37.4%       | 41.1%      | 1.02 (1.01, 1.03)             | 1.12 (1.11, 1.13) |
|                               | Rx - NSAID                  | 31.9%         | 30.5%       | 27.8%      | 0.96 (0.95, 0.97)             | 0.87 (0.86, 0.88) |
|                               | Rx - Muscle Relaxant        | 24.7%         | 23.7%       | 21.5%      | 0.96 (0.95, 0.97)             | 0.87 (0.86, 0.88) |
|                               | Imaging - MRI               | 17.1%         | 17.5%       | 18.1%      | 1.02 (1.01, 1.04)             | 1.06 (1.04, 1.08) |
|                               | Rx Oral Steroid             | 13.7%         | 12.1%       | 10.5%      | 0.88 (0.86, 0.89)             | 0.77 (0.75, 0.78) |
|                               | Rx Gabapentin               | 4.2%          | 3.6%        | 2.9%       | 0.86 (0.83, 0.89)             | 0.69 (0.66, 0.72) |
|                               | Rx - Other                  | 15.8%         | 14.1%       | 11.2%      | 0.89 (0.88, 0.91)             | 0.71 (0.69, 0.72) |
| Third Line                    | Rx Opioid                   | 21.0%         | 17.1%       | 13.3%      | 0.81 (0.80, 0.82)             | 0.63 (0.62, 0.65) |
|                               | Spinal Injection            | 13.7%         | 12.4%       | 10.8%      | 0.90 (0.89, 0.92)             | 0.78 (0.77, 0.80) |
|                               | Imaging - CT                | 3.4%          | 3.3%        | 3.4%       | 0.97 (0.94, 1.01)             | 1.00 (0.96, 1.04) |
|                               | Surgery                     | 2.7%          | 2.5%        | 1.8%       | 0.93 (0.89, 0.98)             | 0.67 (0.64, 0.71) |
| Medicare Advantage (MA)       |                             |               |             |            |                               |                   |
| Episodes - At Least 1 Service |                             | 530269        | 493163      | 368380     |                               |                   |
| First Line                    | Manipulation - Chiropractic | 11.1%         | 11.0%       | 11.5%      | 1.00 (0.98, 1.01)             | 1.04 (1.03, 1.05) |
|                               | Active Care                 | 16.2%         | 16.1%       | 17.7%      | 0.99 (0.98, 1.00)             | 1.10 (1.09, 1.11) |
|                               | Manual Therapy              | 8.2%          | 7.9%        | 8.6%       | 0.98 (0.96, 0.99)             | 1.05 (1.04, 1.07) |
|                               | Passive Therapy             | 3.1%          | 2.8%        | 2.7%       | 0.90 (0.88, 0.92)             | 0.87 (0.84, 0.89) |
|                               | Acupuncture                 | 0.4%          | 0.4%        | 0.5%       | 1.15 (1.08, 1.22)             | 1.42 (1.33, 1.51) |
|                               | Manipulation - Osteopathic  | 0.4%          | 0.4%        | 0.4%       | 0.95 (0.89, 1.01)             | 0.87 (0.81, 0.93) |
| Second Line                   | Imaging - Radiography       | 33.7%         | 34.4%       | 38.5%      | 1.02 (1.01, 1.02)             | 1.14 (1.14, 1.15) |
|                               | Rx - NSAID                  | 32.4%         | 30.4%       | 25.9%      | 0.94 (0.93, 0.94)             | 0.80 (0.79, 0.81) |
|                               | Rx - Muscle Relaxant        | 21.5%         | 19.6%       | 16.6%      | 0.91 (0.90, 0.92)             | 0.77 (0.77, 0.78) |
|                               | Imaging - MRI               | 21.1%         | 22.2%       | 23.6%      | 1.05 (1.04, 1.06)             | 1.12 (1.11, 1.13) |
|                               | Rx Oral Steroid             | 10.4%         | 8.9%        | 7.7%       | 0.86 (0.85, 0.87)             | 0.74 (0.73, 0.75) |
|                               | Rx Gabapentin               | 5.0%          | 4.4%        | 3.0%       | 0.87 (0.86, 0.89)             | 0.60 (0.58, 0.61) |
|                               | Rx - Other                  | 26.9%         | 26.8%       | 20.3%      | 1.00 (0.99, 1.00)             | 0.76 (0.75, 0.76) |
| Third Line                    | Rx Opioid                   | 40.5%         | 32.6%       | 24.1%      | 0.80 (0.80, 0.81)             | 0.59 (0.59, 0.60) |
|                               | Spinal Injection            | 21.6%         | 19.7%       | 17.1%      | 0.91 (0.90, 0.92)             | 0.79 (0.79, 0.80) |
|                               | Imaging - CT                | 7.9%          | 8.0%        | 8.1%       | 1.01 (1.00, 1.03)             | 1.03 (1.02, 1.05) |
|                               | Surgery                     | 2.9%          | 2.7%        | 2.0%       | 0.93 (0.91, 0.95)             | 0.67 (0.66, 0.69) |

Pre=Pre-COVID period, Early=first 12 months post-COVID, Late=13-24 months post-COVID

For %, cells with red text indicate the type of HCP initially contacted was not significantly different from pre-COVID period (Fisher's Exact p > .05)

For %, cells with black text indicate the type of HCP initially contacted was significantly different from pre-COVID period (Fisher's Exact p > .05)

For risk ratio, cells in red indicate the confidence interval includes 1 and likelihood of HCP being initially contacted is not different than the pre-COVID reference
