# Supplementary material for: Impact of the COVID-19 pandemic on low back pain management in commercially insured and Medicare Advantage cohorts. A retrospective cohort study
Source: bioRxiv or medRxiv preprint supplement (doi:10.1101/2023.05.15.23289993), 2023-05-21
Supplement: Supplementary file [file media-10.pdf]

Supplement - Table 3 - Services Provided for LBP in the Pre-, Early and Late COVID Periods by Stringency of State Public Policy Response

|                           | % of LBP Episodes Including Service |       |       |             |       |       |            |       |       | Risk Ratio and 95% Confidence Interval Compared to Top 25 Baseline |                     |                   |                   |                   |                   | Risk Ratio and 95% Confidence Interval Compared to Pre-COVID Baseline |                   |                   |                   |                   |                   |             |       |        |            |  |  |
|---------------------------|-------------------------------------|-------|-------|-------------|-------|-------|------------|-------|-------|--------------------------------------------------------------------|---------------------|-------------------|-------------------|-------------------|-------------------|-----------------------------------------------------------------------|-------------------|-------------------|-------------------|-------------------|-------------------|-------------|-------|--------|------------|--|--|
|                           | Pre-COVID                           |       |       | Early COVID |       |       | Late COVID |       |       | Pre-COVID                                                          |                     |                   | Early COVID       |                   |                   | Late COVID                                                            |                   |                   | Pre-COVID         |                   |                   | Early COVID |       |        | Late COVID |  |  |
|                           | B25                                 | Mixed | T25   | B25         | Mixed | T25   | B25        | Mixed | T25   | Bottom 25                                                          | Mixed               | Bottom 25         | Mixed             | Bottom 25         | Mixed             | Bottom 25                                                             | Mixed             | Top 25            | Bottom 25         | Mixed             | Top 25            | Bottom 25   | Mixed | Top 25 |            |  |  |
| <b>Commercial</b>         |                                     |       |       |             |       |       |            |       |       |                                                                    |                     |                   |                   |                   |                   |                                                                       |                   |                   |                   |                   |                   |             |       |        |            |  |  |
| At least one              | 22642                               | 25182 | 18772 | 26414       | 30251 | 20710 | 26018      | 29437 | 20722 |                                                                    |                     |                   |                   |                   |                   |                                                                       |                   |                   |                   |                   |                   |             |       |        |            |  |  |
| AC                        | 23.9%                               | 20.0% | 24.9% | 21.5%       | 18.8% | 21.0% | 23.2%      | 19.9% | 21.9% | 0.96 (0.93, 0.99)                                                  | 0.80 (0.78, 0.83)   | 1.02 (0.98, 1.06) | 0.89 (0.86, 0.93) | 1.06 (1.03, 1.10) | 0.91 (0.88, 0.94) | 0.90 (0.87, 0.93)                                                     | 0.94 (0.91, 0.97) | 0.85 (0.82, 0.88) | 0.97 (0.94, 1.00) | 0.99 (0.96, 1.03) | 0.88 (0.85, 0.91) |             |       |        |            |  |  |
| MT                        | 13.2%                               | 12.8% | 18.4% | 11.4%       | 11.5% | 14.7% | 11.7%      | 11.8% | 15.3% | 1.32 (1.28, 1.37)                                                  | 0.70 (0.67, 0.73)   | 0.77 (0.74, 0.81) | 0.78 (0.74, 0.81) | 0.77 (0.73, 0.80) | 0.77 (0.74, 0.81) | 0.86 (0.82, 0.91)                                                     | 0.90 (0.86, 0.94) | 0.80 (0.77, 0.84) | 0.89 (0.85, 0.93) | 0.92 (0.88, 0.96) | 0.83 (0.80, 0.87) |             |       |        |            |  |  |
| CMT                       | 29.2%                               | 28.5% | 21.8% | 29.2%       | 28.7% | 21.4% | 28.3%      | 27.6% | 20.2% | 0.74 (0.69, 0.75)                                                  | 1.31 (1.26, 1.35)   | 1.37 (1.32, 1.41) | 1.34 (1.30, 1.39) | 1.40 (1.36, 1.45) | 1.36 (1.32, 1.41) | 1.00 (0.97, 1.03)                                                     | 1.01 (0.98, 1.04) | 0.98 (0.95, 1.02) | 0.97 (0.95, 1.00) | 0.97 (0.94, 1.00) | 0.93 (0.89, 0.96) |             |       |        |            |  |  |
| PT                        | 13.9%                               | 14.4% | 12.1% | 12.9%       | 13.0% | 10.9% | 12.4%      | 11.8% | 10.4% | 1.09 (1.04, 1.15)                                                  | 1.13 (1.07, 1.18)   | 1.18 (1.13, 1.25) | 1.20 (1.14, 1.26) | 1.19 (1.13, 1.25) | 1.13 (1.07, 1.19) | 0.93 (0.89, 0.97)                                                     | 0.91 (0.87, 0.94) | 0.85 (0.81, 0.90) | 0.89 (0.85, 0.93) | 0.82 (0.79, 0.86) | 0.82 (0.77, 0.86) |             |       |        |            |  |  |
| Acu                       | 0.2%                                | 0.4%  | 1.1%  | 0.2%        | 0.3%  | 0.7%  | 0.2%       | 0.3%  | 0.9%  | 0.20 (0.15, 0.27)                                                  | 0.33 (0.26, 0.42)   | 0.30 (0.22, 0.40) | 0.38 (0.29, 0.50) | 0.26 (0.19, 0.35) | 0.40 (0.31, 0.51) | 0.94 (0.64, 1.38)                                                     | 0.74 (0.55, 1.00) | 0.64 (0.52, 0.79) | 1.03 (0.70, 1.50) | 0.96 (0.72, 1.27) | 0.79 (0.65, 0.97) |             |       |        |            |  |  |
| OMT                       | 0.6%                                | 0.7%  | 1.0%  | 0.4%        | 0.5%  | 1.1%  | 0.5%       | 0.5%  | 0.8%  | 0.64 (0.52, 0.80)                                                  | 0.67 (0.54, 0.82)   | 0.40 (0.32, 0.51) | 0.43 (0.35, 0.53) | 0.58 (0.46, 0.74) | 0.57 (0.45, 0.71) | 0.68 (0.53, 0.87)                                                     | 0.70 (0.56, 0.88) | 1.08 (0.89, 1.32) | 0.76 (0.60, 0.97) | 0.71 (0.57, 0.89) | 0.84 (0.68, 1.03) |             |       |        |            |  |  |
| Image - Rad               | 37.4%                               | 39.1% | 35.1% | 35.6%       | 36.8% | 35.3% | 39.1%      | 40.2% | 39.6% | 1.07 (1.04, 1.09)                                                  | 1.11 (1.09, 1.14)   | 1.01 (0.98, 1.03) | 1.04 (1.02, 1.07) | 0.99 (0.97, 1.01) | 1.02 (0.99, 1.04) | 0.95 (0.93, 0.97)                                                     | 0.94 (0.92, 0.96) | 1.01 (0.98, 1.03) | 1.05 (1.02, 1.07) | 1.03 (1.01, 1.05) | 1.14 (1.10, 1.16) |             |       |        |            |  |  |
| Image - MRI               | 10.3%                               | 10.9% | 10.4% | 9.7%        | 10.1% | 10.9% | 11.4%      | 11.4% | 14.2% | 0.99 (0.94, 1.05)                                                  | 1.04 (0.99, 1.10)   | 1.00 (0.95, 1.05) | 0.93 (0.88, 0.98) | 0.80 (0.77, 0.84) | 0.81 (0.77, 0.84) | 0.94 (0.90, 1.00)                                                     | 0.93 (0.88, 0.97) | 1.01 (0.98, 1.11) | 1.10 (1.05, 1.16) | 1.05 (1.01, 1.10) | 1.36 (1.29, 1.44) |             |       |        |            |  |  |
| Rx - NSAID                | 21.5%                               | 21.8% | 24.4% | 22.4%       | 22.4% | 20.4% | 22.2%      | 22.1% | 22.2% | 0.88 (0.85, 0.91)                                                  | 0.89 (0.86, 0.92)   | 0.93 (0.90, 0.96) | 0.93 (0.90, 0.96) | 1.00 (0.97, 1.04) | 1.00 (0.96, 1.03) | 1.04 (1.00, 1.07)                                                     | 1.03 (1.00, 1.06) | 0.98 (0.95, 1.02) | 1.03 (1.00, 1.07) | 1.02 (0.98, 1.05) | 0.91 (0.88, 0.94) |             |       |        |            |  |  |
| Rx - MM Rilz              | 20.6%                               | 21.6% | 20.4% | 20.9%       | 21.3% | 20.5% | 19.0%      | 20.0% | 19.2% | 1.01 (0.97, 1.05)                                                  | 1.06 (1.02, 1.10)   | 1.02 (0.99, 1.06) | 1.04 (1.00, 1.08) | 0.99 (0.95, 1.03) | 1.00 (0.96, 1.03) | 1.02 (0.98, 1.06)                                                     | 0.98 (0.95, 1.02) | 1.00 (0.96, 1.04) | 0.92 (0.89, 0.96) | 0.93 (0.90, 0.96) | 0.94 (0.90, 0.98) |             |       |        |            |  |  |
| Rx - Steroid              | 10.7%                               | 12.2% | 10.4% | 9.9%        | 11.1% | 8.8%  | 9.1%       | 9.5%  | 7.8%  | 1.03 (0.98, 1.09)                                                  | 1.18 (1.12, 1.24)   | 1.13 (1.06, 1.19) | 1.26 (1.20, 1.33) | 1.16 (1.09, 1.23) | 1.21 (1.14, 1.29) | 0.92 (0.87, 0.97)                                                     | 0.91 (0.87, 0.95) | 0.85 (0.80, 0.90) | 0.85 (0.80, 0.89) | 0.77 (0.74, 0.81) | 1.75 (1.71, 0.80) |             |       |        |            |  |  |
| Rx - Gabap                | 1.4%                                | 1.4%  | 1.8%  | 1.5%        | 1.6%  | 2.1%  | 1.5%       | 1.4%  | 2.1%  | 0.76 (0.65, 0.89)                                                  | 0.80 (0.69, 0.92)   | 0.73 (0.64, 0.83) | 0.75 (0.66, 0.85) | 0.71 (0.62, 0.81) | 0.67 (0.59, 0.77) | 1.11 (0.96, 1.28)                                                     | 1.09 (0.95, 1.24) | 1.16 (1.01, 1.33) | 1.06 (0.92, 1.23) | 0.97 (0.84, 1.11) | 1.14 (0.99, 1.31) |             |       |        |            |  |  |
| Rx - Oth                  | 5.5%                                | 6.3%  | 6.4%  | 6.1%        | 6.9%  | 7.0%  | 5.7%       | 6.7%  | 6.3%  | 0.87 (0.80, 0.93)                                                  | 0.98 (0.91, 1.06)   | 0.87 (0.81, 0.93) | 1.00 (0.93, 1.06) | 0.90 (0.84, 0.97) | 1.06 (0.99, 1.13) | 1.10 (1.02, 1.18)                                                     | 1.11 (1.04, 1.18) | 1.09 (1.01, 1.18) | 1.03 (0.96, 1.11) | 1.07 (1.00, 1.14) | 0.99 (0.92, 1.07) |             |       |        |            |  |  |
| Rx - Opioid               | 10.1%                               | 9.4%  | 8.4%  | 9.8%        | 8.8%  | 8.8%  | 9.5%       | 8.7%  | 7.8%  | 1.19 (1.12, 1.27)                                                  | 1.12 (1.05, 1.19)   | 1.11 (1.05, 1.18) | 1.12 (1.06, 1.18) | 1.21 (1.14, 1.28) | 1.11 (1.04, 1.18) | 0.97 (0.92, 1.02)                                                     | 1.04 (0.99, 1.09) | 1.04 (0.97, 1.11) | 0.94 (0.89, 0.99) | 0.92 (0.88, 0.97) | 0.93 (0.87, 0.99) |             |       |        |            |  |  |
| Spinal Inj                | 5.0%                                | 4.8%  | 6.3%  | 5.0%        | 4.7%  | 6.2%  | 5.1%       | 5.3%  | 6.5%  | 0.45 (0.35, 0.57)                                                  | 0.77 (0.62, 0.94)   | 0.81 (0.73, 0.89) | 0.76 (0.70, 0.82) | 0.78 (0.74, 0.84) | 0.81 (0.75, 0.87) | 1.02 (0.93, 1.08)                                                     | 0.97 (0.90, 1.04) | 0.99 (0.91, 1.06) | 1.02 (0.94, 1.10) | 1.08 (1.01, 1.17) | 1.04 (0.96, 1.12) |             |       |        |            |  |  |
| Image - CT                | 2.7%                                | 2.8%  | 1.7%  | 2.7%        | 2.7%  | 2.0%  | 3.4%       | 2.9%  | 2.2%  | 1.53 (1.34, 1.75)                                                  | 1.63 (1.43, 1.85)   | 1.37 (1.21, 1.54) | 1.36 (1.21, 1.53) | 1.54 (1.38, 1.72) | 1.34 (1.20, 1.50) | 1.02 (0.92, 1.14)                                                     | 0.96 (0.87, 1.06) | 1.14 (0.99, 1.32) | 1.26 (1.13, 1.39) | 1.03 (0.93, 1.14) | 1.25 (1.09, 1.44) |             |       |        |            |  |  |
| Spinal Surg               | 0.6%                                | 0.7%  | 0.7%  | 0.6%        | 0.6%  | 0.6%  | 0.6%       | 0.4%  | 0.6%  | 0.82 (0.65, 1.05)                                                  | 0.99 (0.79, 1.24)   | 1.13 (0.91, 1.41) | 1.01 (0.81, 1.26) | 1.08 (0.85, 1.37) | 0.79 (0.62, 1.02) | 1.24 (0.99, 1.54)                                                     | 0.91 (0.74, 1.12) | 0.90 (0.71, 1.14) | 1.06 (0.84, 1.33) | 0.64 (0.51, 0.80) | 1.00 (0.63, 1.03) |             |       |        |            |  |  |
| <b>Medicare Advantage</b> |                                     |       |       |             |       |       |            |       |       |                                                                    |                     |                   |                   |                   |                   |                                                                       |                   |                   |                   |                   |                   |             |       |        |            |  |  |
| At least one              | 52167                               | 56931 | 31277 | 56383       | 61771 | 33312 | 63274      | 71268 | 36711 |                                                                    |                     |                   |                   |                   |                   |                                                                       |                   |                   |                   |                   |                   |             |       |        |            |  |  |
| AC                        | 10.6%                               | 14.2% | 14.4% | 8.8%        | 11.8% | 11.6% | 11.1%      | 14.3% | 14.1% | 0.73 (0.71, 0.76)                                                  | 0.99 (0.96, 1.02)   | 0.76 (0.73, 0.79) | 1.02 (0.98, 1.06) | 0.78 (0.76, 0.81) | 1.01 (0.98, 1.04) | 0.83 (0.80, 0.86)                                                     | 0.83 (0.80, 0.85) | 0.80 (0.77, 0.84) | 1.05 (1.01, 1.08) | 1.00 (0.98, 1.03) | 0.98 (0.95, 1.02) |             |       |        |            |  |  |
| MT                        | 5.0%                                | 6.8%  | 8.2%  | 4.1%        | 5.4%  | 6.3%  | 4.6%       | 6.6%  | 7.4%  | 0.62 (0.58, 0.65)                                                  | 0.82 (0.79, 0.87)   | 0.65 (0.62, 0.69) | 0.87 (0.82, 0.91) | 0.63 (0.60, 0.66) | 0.90 (0.86, 0.94) | 0.81 (0.77, 0.86)                                                     | 0.80 (0.77, 0.84) | 0.76 (0.72, 0.81) | 0.92 (0.88, 0.97) | 0.98 (0.94, 1.02) | 0.90 (0.85, 0.95) |             |       |        |            |  |  |
| CMT                       | 9.1%                                | 12.8% | 9.9%  | 8.3%        | 11.5% | 8.9%  | 9.6%       | 11.7% | 9.9%  | 0.92 (0.88, 0.96)                                                  | 1.29 (1.24, 1.34)   | 0.93 (0.89, 0.98) | 1.29 (1.24, 1.35) | 0.97 (0.93, 1.00) | 1.17 (1.13, 1.22) | 0.91 (0.87, 0.94)                                                     | 0.90 (0.87, 0.92) | 0.89 (0.85, 0.94) | 1.05 (1.01, 0.99) | 0.91 (0.88, 0.94) | 1.00 (0.95, 1.05) |             |       |        |            |  |  |
| PT                        | 2.3%                                | 2.0%  | 2.9%  | 1.7%        | 1.5%  | 2.0%  | 1.8%       | 1.5%  | 2.2%  | 0.79 (0.72, 0.86)                                                  | 0.69 (0.64, 0.76)   | 0.88 (0.80, 0.97) | 0.79 (0.71, 0.87) | 0.86 (0.78, 0.94) | 0.77 (0.65, 0.78) | 0.77 (0.70, 0.83)                                                     | 0.78 (0.71, 0.85) | 0.69 (0.62, 0.76) | 0.82 (0.76, 0.89) | 0.78 (0.71, 0.84) | 0.75 (0.68, 0.83) |             |       |        |            |  |  |
| Acu                       | 0.0%                                | 0.1%  | 1.0%  | 0.1%        | 0.1%  | 0.6%  | 0.1%       | 0.2%  | 1.0%  | 0.05 (0.03, 0.07)                                                  | 0.07 (0.05, 0.10)   | 0.17 (0.13, 0.22) | 0.22 (0.17, 0.29) | 0.13 (0.10, 0.16) | 0.16 (0.13, 0.20) | 2.37 (1.47, 3.84)                                                     | 1.93 (1.33, 2.80) | 0.64 (0.54, 0.76) | 2.90 (1.83, 4.61) | 2.30 (1.61, 3.28) | 1.04 (0.89, 1.21) |             |       |        |            |  |  |
| OMT                       | 0.2%                                | 0.4%  | 0.5%  | 0.1%        | 0.3%  | 0.5%  | 0.2%       | 0.2%  | 0.4%  | 0.45 (0.35, 0.57)                                                  | 0.77 (0.62, 0.94)   | 0.30 (0.23, 0.39) | 0.65 (0.53, 0.81) | 0.44 (0.34, 0.55) | 0.57 (0.46, 0.71) | 0.66 (0.49, 0.88)                                                     | 0.85 (0.70, 1.03) | 0.99 (0.79, 1.24) | 0.85 (0.65, 1.10) | 0.68 (0.53, 0.80) | 0.87 (0.69, 1.09) |             |       |        |            |  |  |
| Image - Rad               | 35.1%                               | 35.3% | 32.0% | 31.7%       | 32.6% | 30.1% | 36.0%      | 37.4% | 35.8% | 1.10 (1.07, 1.12)                                                  | 1.10 (1.08, 1.12)   | 1.05 (1.03, 1.07) | 1.08 (1.06, 1.11) | 1.01 (0.99, 1.02) | 1.04 (1.03, 1.06) | 0.90 (0.89, 0.92)                                                     | 0.92 (0.91, 0.94) | 0.94 (0.92, 0.96) | 1.03 (1.01, 1.04) | 1.06 (1.05, 1.08) | 1.12 (1.10, 1.14) |             |       |        |            |  |  |
| Rx - NSAID                | 21.9%                               | 17.9% | 21.5% | 22.4%       | 18.2% | 20.8% | 21.3%      | 16.8% | 19.0% | 1.02 (0.99, 1.05)                                                  | 0.83 (0.81, 0.85)   | 1.08 (1.05, 1.11) | 0.88 (0.85, 0.90) | 1.12 (1.09, 1.15) | 0.88 (0.86, 0.90) | 1.02 (1.00, 1.04)                                                     | 1.02 (1.00, 1.05) | 0.97 (0.94, 1.00) | 0.97 (0.95, 0.99) | 0.94 (0.92, 0.96) | 0.89 (0.86, 0.91) |             |       |        |            |  |  |
| Image - MRI               | 13.9%                               | 14.5% | 13.4% | 13.5%       | 14.1% | 13.4% | 16.3%      | 17.6% | 16.4% | 1.04 (1.00, 1.08)                                                  | 1.08 (1.05, 1.12)   | 1.01 (0.98, 1.05) | 1.05 (1.02, 1.09) | 1.00 (0.97, 1.02) | 1.07 (1.04, 1.10) | 0.98 (0.95, 1.01)                                                     | 0.97 (0.95, 1.00) | 1.00 (0.96, 1.04) | 1.18 (1.15, 1.21) | 1.21 (1.18, 1.24) | 1.23 (1.18, 1.27) |             |       |        |            |  |  |
| Rx - MM Rilz              | 15.0%                               | 11.7% | 12.9% | 14.6%       | 12.2% | 13.0% | 15.2%      | 12.3% | 12.9% | 1.16 (1.12, 1.20)                                                  | 0.90 (0.87, 0.94)   | 1.12 (1.08, 1.16) | 0.94 (0.90, 0.97) | 1.18 (1.14, 1.22) | 0.95 (0.92, 0.98) | 0.97 (0.95, 1.00)                                                     | 1.04 (1.01, 1.08) | 1.01 (0.97, 1.05) | 1.01 (0.99, 1.04) | 1.05 (1.02, 1.08) | 1.00 (0.96, 1.04) |             |       |        |            |  |  |
| Rx - Steroid              | 8.9%                                | 8.8%  | 7.9%  | 7.8%        | 7.5%  | 6.4%  | 6.8%       | 6.7%  | 5.8%  | 1.12 (1.07, 1.17)                                                  | 1.11 (1.06, 1.16)   | 1.21 (1.15, 1.27) | 1.17 (1.11, 1.23) | 1.19 (1.13, 1.25) | 1.16 (1.11, 1.22) | 0.87 (0.84, 0.91)                                                     | 0.85 (0.82, 0.88) | 0.81 (0.76, 0.85) | 0.77 (0.74, 0.80) | 0.76 (0.73, 0.79) | 0.73 (0.69, 0.77) |             |       |        |            |  |  |
| Rx - Gabap                | 2.3%                                | 2.2%  | 2.7%  | 2.1%        | 1.9%  | 2.7%  | 1.8%       | 1.6%  | 1.9%  | 0.85 (0.78, 0.93)                                                  | 0.82 (0.75, 0.89)   | 0.79 (0.72, 0.86) | 0.72 (0.66, 0.78) | 0.92 (0.84, 1.01) | 0.84 (0.76, 0.92) | 0.91 (0.84, 0.98)                                                     | 0.86 (0.79, 0.93) | 0.98 (0.89, 1.08) | 0.77 (0.71, 0.83) | 0.72 (0.67, 0.78) | 0.71 (0.65, 0.79) |             |       |        |            |  |  |
| Rx - Oth                  | 11.7%                               | 11.6% | 13.1% | 14.1%       | 14.1% | 15.6% | 11.9%      | 11.6% | 12.2% | 0.89 (0.86, 0.92)                                                  | 0.88 (0.85, 0.92)   | 0.90 (0.87, 0.93) | 0.90 (0.87, 0.93) | 0.97 (0.94, 1.00) | 0.95 (0.92, 0.98) | 1.21 (1.17, 1.25)                                                     | 1.22 (1.18, 1.25) | 1.19 (1.15, 1.24) | 1.02 (0.99, 1.05) | 1.00 (0.97, 1.03) | 0.93 (0.90, 0.97) |             |       |        |            |  |  |
| Rx - Opioid               | 19.6%                               | 13.6% | 16.6% | 19.0%       | 14.1% | 16.2% | 17.8%      | 13.5% | 14.6% | 1.18 (1.14, 1.22)                                                  | 0.82 (0.79, 0.84)   | 1.17 (1.14, 1.20) | 0.87 (0.84, 0.90) | 1.22 (1.18, 1.25) | 0.93 (0.90, 0.96) | 0.97 (0.95, 0.99)                                                     | 1.04 (1.01, 1.07) | 0.98 (0.94, 1.01) | 0.91 (0.89, 0.93) | 1.00 (0.97, 1.03) | 0.88 (0.85, 0.91) |             |       |        |            |  |  |
| Spinal Inj                | 8.4%                                | 8.7%  | 7.4%  | 8.1%        | 6.4%  | 6.8%  | 9.0%       | 9.2%  | 7.9%  | 1.14 (1.09, 1.20)                                                  | 1.18 (1.13, 1.24)</ |                   |                   |                   |                   |                                                                       |                   |                   |                   |                   |                   |             |       |        |            |  |  |
